# Supplementary material for: Tailoring helical ends of π-extended [6]heterohelicenes to control optical, and electrochemical features
Source: Royal Society of Chemistry journal article supplement (doi:10.1039/d4cc03707c), 2024-01-01
Supplement: d4cc03707c1.pdf [file d4cc03707c1.pdf]

# Tailoring Helical Ends of $\pi$ -Extended [6]Heterohelicenes to Control Optical, and Electrochemical Features

Viksit Kumar,<sup>a,b</sup> Sangram D. Dongre,<sup>a,b</sup> Geethu Venugopal,<sup>a,b</sup> Aswini Narayanan,<sup>a,b</sup> Sukumaran Santhosh Babu<sup>\*,a,b</sup>

<sup>a</sup>Organic Chemistry Division, National Chemical Laboratory (CSIR-NCL), Dr. Homi Bhabha Road, Pune-411008, India

<sup>b</sup>Academy of Scientific and Innovative Research (AcSIR), Ghaziabad-201002, India

## Table of Contents

| Sr. No. | Content                 | Page No. |
|---------|-------------------------|----------|
| 1.      | General Information     | S2       |
| 2.      | Experimental Procedures | S4       |
| 3.      | Figures                 | S27      |
| 4.      | Tables                  | S44      |
| 11.     | References              | S53      |

## General Information

### Materials

All chemicals, 3-Bromo-1,2-benzenediamine, 4-tertbutyl Phenylacetylene, 4-tert-butyl iodobenzene (TCI), potassium hydroxide (Loba Chemie), Lithium aluminium hydride, Selenium dioxide (Chempure) and copper Iodide (Spectrochem) were used as received. The solvents such as dichloromethane (CH<sub>2</sub>Cl<sub>2</sub>), N, N-dimethylformamide (DMF), toluene, Diisopropylamine, dimethyl sulfoxide (DMSO), Thionyl chloride (Finar), were used after distillation in calcium hydride as further purification.

Thin layer chromatography was carried out using Aluchrosep Silica Gel 60/UV254 purchased from Merck Specialities Pvt Ltd and visualized either by UV Fluorescence or by iodine chamber. Column chromatography was performed using silica gel (100-200 mesh), bed was made by using 60-120 mesh silica purchased from Spectrochem Pvt. Ltd. India, and mixtures of Dichloromethane-Petroleum ether used for elution were distilled before use.

### General

All the reactions were carried out in oven-dried round bottom flasks under an argon atmosphere unless otherwise mentioned. The <sup>1</sup>H, <sup>13</sup>C NMR spectra were recorded at Bruker-400 and 500 MHz NMR spectrometer instruments. The chemical shift values for <sup>1</sup>H (TMS as internal standard) and <sup>13</sup>C NMR are recorded in CDCl<sub>3</sub>. The value of the coupling constant (*J*) is stated in Hertz (Hz). UV-Vis absorption spectra were recorded with a Shimadzu 1800 spectrophotometer, while all emission spectra were performed using PTI Quanta Master™ Steady State Spectrofluorometer. The mass spectrometry experiments were conducted on Bruker ultraflex MALDI-TOF MS. The mass spectrum was recorded using 2, 5-Dihydroxybenzoic acid (DHB) as a matrix material. Steady State Spectrofluorometer. HPLC analysis was performed on Agilent 1260, Infinity Series using normal (CHIRALPAK SA, 5 mm, 4.6 mm x 250 mm) columns. Chiral molecule **SNG** and **SeNG** were separated using n-hexane: isopropanol (90:10) by monitoring at 254 nm. CD spectra were recorded on a Jasco J-815 CD spectrometer equipped with a Jasco PTC-424S/15 Peltier system. X-ray intensity data were collected on a Bruker SMART APEX II CCD diffractometer with graphite-monochromatized (Mo K $\alpha$  = 0.71073 Å) radiation at ambient temperature.

### **X-ray Single Crystallography**

Single crystal of **SNG** and **SeNG**, suitable for X-ray crystallography analysis was obtained by slow evaporation of methanol and  $\text{CHCl}_3/\text{CDCl}_3$  solution for 3 weeks. The crystal structure was deposited at the Cambridge Crystallographic Data Centre (CCDC) and the data can be obtained free of charge via [www.ccdc.cam.ac.uk/structures](http://www.ccdc.cam.ac.uk/structures).

### **X-ray intensity data measurements**

X-ray intensity data measurements of all the samples were carried out on a Bruker D8 VENTURE Kappa Duo PHOTON II CPAD diffractometer equipped with Incoatech multilayer mirrors optics. The intensity measurements were carried out with a micro-focus sealed tube diffraction source ( $\text{MoK}_\alpha = 0.71073 \text{ \AA}$ ) at 100(2) K temperature. The X-ray generator was operated at 50 kV and 1.4 mA. A preliminary set of cell constants and an orientation matrix were calculated from three sets of 36 frames. Data were collected with  $\omega$  and  $\varphi$  scan width of  $0.5^\circ$  at different settings of  $\varphi$ ,  $\omega$  and  $2\theta$  keeping the sample-to-detector distance fixed at 5.00 cm. The X-ray data collection was monitored by the APEX3 program (Bruker, 2016). All the data were corrected for Lorentzian, polarization, and absorption effects using SAINT and SADABS programs (Bruker, 2016). Using the APEX3 (Bruker) program suite, the structure was solved with the ShelXS-97 (Sheldrick, 2008) structure solution program, using direct methods. The model was refined with a version of ShelXL-2013 (Sheldrick, 2015) using Least Squares minimization. All the hydrogen atoms were placed in a geometrically idealized position and constrained to ride on their parent atoms. An *ORTEP* III view of the compound was drawn with 50% probability displacement ellipsoids, and H atoms are shown as small spheres of arbitrary radii.

## Experimental Procedures:

### Synthesis:

Heterohelicene synthesis is shown in Scheme S1.<sup>S1</sup>

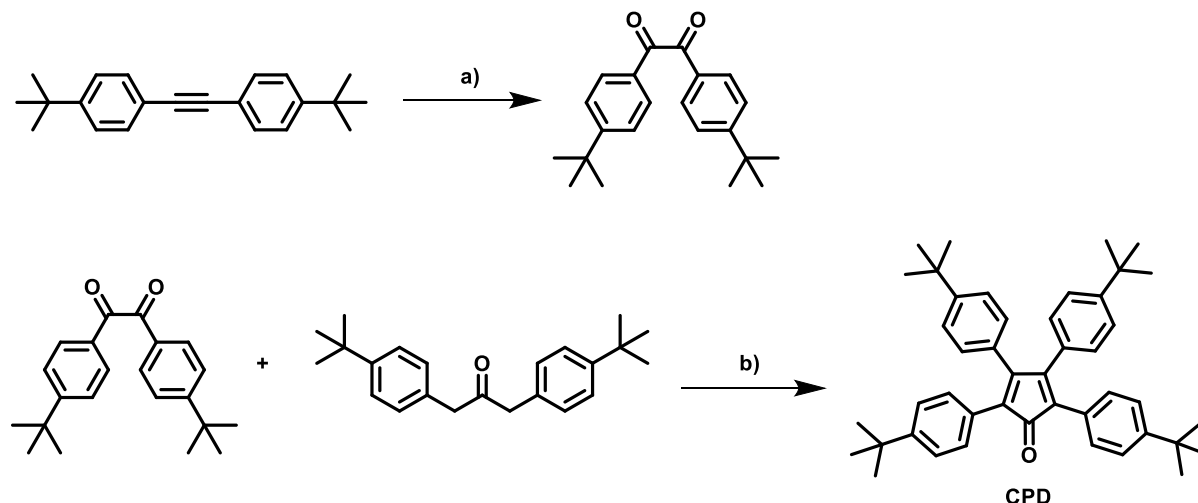

**Scheme S1.** Synthesis of  $\pi$ -extended SNG and SeNG helicenes. Conditions: a)  $I_2$ , DMSO, 150 °C, 10 h, 91%, b) KOH, EtOH, reflux, 1 h, 85%.

### Synthesis of 4-Bromobenzo[c][1,2,5]thiadiazole (2):

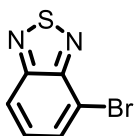

In an oven-dried round bottom flask, 3-bromo-1,2-benzenediamine **1** (5g, 1 mmol) was taken and dissolved in  $CH_2Cl_2$  (20 mL) followed by the addition of triethylamine (16 mL, 5 mmol). In an addition funnel,  $SOCl_2$  (5 mL, 3 mmol) was dissolved in  $CH_2Cl_2$  (10 mL) and added dropwise to the reaction mixture, the reaction mixture was stirred at reflux temperature. The reaction was monitored by TLC. After completion of the reaction, the solvent was removed under vacuum, and the combined organic layer was washed with water and concentrated under vacuum. The 4-bromobenzo[c][1,2,5]thiadiazole **2** was isolated by column chromatography (4.23g, 75%).

$^1H$  NMR (400 MHz,  $CDCl_3$ ):  $\delta$  [ppm] = 7.94 (d,  $J$  = 8.8 Hz, 1 H), 7.81 (d,  $J$  = 7.1 Hz, 1 H), 7.45 ppm (t,  $J$  = 7.9 Hz, 1 H).

$^{13}C$  NMR (100 MHz,  $CDCl_3$ ):  $\delta$  [ppm] = 154.6, 153.3, 131.9, 129.9, 120.9, 114.4.

**HRMS-ESI:** m/z calculated for C<sub>6</sub>H<sub>4</sub>N<sub>2</sub>BrS [M+H]<sup>+</sup>: 214.9279, found: 214.9273.

Melting point: 78 °C.

**Procedure for synthesis of 4-((4-(tert-butyl)phenyl)ethynyl)benzo[c][1,2,5]thiadiazole (3):**

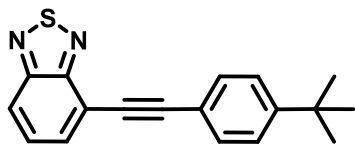

To a mixture of 4-bromo-2,1,3-benzothiadiazole **2** (500 mg, 1 mmol), Pd(PPh<sub>3</sub>)<sub>2</sub>Cl<sub>2</sub> (37.2 mg, 0.01 mmol), and CuI (11.56 mg, 0.03 mmol) in diisopropylamine (5 mL) was added 4-*tert*-butylphenylacetylene (0.4 mL, 352 mg, 1.1 mmol). The mixture was stirred at rt for 30 mins under nitrogen, then the temperature was raised and kept at 70 °C for 24 h. After cooling, CH<sub>2</sub>Cl<sub>2</sub> (50 mL) was added. Then, the solution was washed with water (30 mL × 2) and brine (30 mL). The obtained organic solution was dried over Na<sub>2</sub>SO<sub>4</sub>. The solvent was removed on a rotary evaporator, and the residue was purified by silica gel column chromatography using CH<sub>2</sub>Cl<sub>2</sub>/*n*-hexane (1:10, v/v) as eluent to afford **3** as a greenish-yellow powder (557 mg, 85%).

**<sup>1</sup>H NMR (500 MHz, CDCl<sub>3</sub>):** δ [ppm] = 7.99 (dd, *J* = 8.8, 0.9 Hz, 1 H), 7.80 (dd, *J* = 6.9, 0.9 Hz, 1 H), 7.57 - 7.64 (m, 3 H, merged triplet and doublet), 7.42 (d, *J* = 8.5 Hz, 2 H), 1.35 ppm (s, 9 H)

**<sup>13</sup>C NMR (125 MHz, CDCl<sub>3</sub>):** δ [ppm] = 154.6, 154.6, 152.3, 132.5, 131.7, 129.2, 125.4, 121.5, 119.6, 117.5, 96.1, 84.5, 34.9, 31.1.

**HRMS-ESI:** m/z calculated for C<sub>18</sub>H<sub>17</sub>N<sub>2</sub>S [M+H]<sup>+</sup>: 293.1112, found: 293.1109.

Melting point: 112 °C.

**Procedure for synthesis of 4-((4-(tert-butyl)phenyl)ethynyl)benzo[c][1,2,5] selenidiazole (4):**

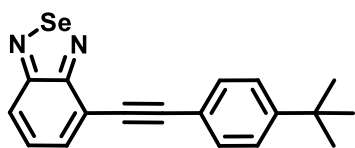

The 4-((4-(tert-butyl)phenyl)ethynyl)benzo[c][1,2,5]thiadiazole **3** (100 mg, 1.00 equiv.) was dissolved in THF (5 mL) in a heatgun-dried Schlenk-tube under nitrogen. LiAlH<sub>4</sub> (65 mg, 5 equiv.) was added slowly over 10 min at 0 °C. After stirring for 2h at room temperature until the starting material was completely consumed. After that, the mixture was cooled down to 0 °C again and added a saturated NH<sub>4</sub>Cl solution. The mixture was diluted with water (30 mL) and extracted three times with diethyl ether. The combined organic layers were dried over Na<sub>2</sub>SO<sub>4</sub> and evaporated. The crude product was directly used for the next reaction for which the solution of the diamine (1 equiv.) in EtOH (8 mL per 50 mg diamine) at 60 °C was added a solution of selenium dioxide (5 equiv.) in hot water (100 mg SeO<sub>2</sub> in 1 mL). After heating the mixture overnight it was diluted with water and extracted three times with DCM. Purification by flash column chromatography gives 4-((4-(tert-butyl)phenyl)ethynyl)benzo[c][1,2,5]selenodiazole 75 mg, 65% in two steps.

<sup>1</sup>H NMR (500 MHz, CDCl<sub>3</sub>): δ [ppm] = 7.83 (dd, *J* = 9.1, 0.9 Hz, 1 H), 7.69 (dd, *J* = 6.8, 0.9 Hz, 1 H), 7.60 (d, *J* = 8.5 Hz, 2 H), 7.48 (t, 1 H), 7.41 (d, *J* = 8.5 Hz, 2 H), 1.35 ppm (s, 9 H)

<sup>13</sup>C NMR (125 MHz, CDCl<sub>3</sub>): δ [ppm] = 160.1, 159.7, 152.2, 132.7, 131.7, 129.4, 125.4, 123.6, 119.6, 119.0, 96.0, 85.0, 34.9, 31.1

**HRMS-ESI:** *m/z* calculated for C<sub>18</sub>H<sub>17</sub>N<sub>2</sub>Se [M+H]<sup>+</sup>: 341.0557, found: 341.0536.

Melting point: 115 °C.

### General procedure for the synthesis of **5** and **6**:

A sealing tube (20 mL) equipped with a magnetic stirring bar was charged with **3** or **4** (1 eq.) and 2,3,4,5-tetrakis(4-(tert-butyl)phenyl)cyclopenta-2,4-diene-1-one **CPD** (1.1 eq) and toluene (1.5 mL for 200 mg reaction). The flask was purged with N<sub>2</sub> and closed. The reaction mixture was stirred for 48 h at 230 °C. After cooling to RT, 20 mL methanol was added and filtered off the white solid precipitate and was washed with an excess of cold methanol until the filtrate remained colorless. The remaining solid was dried under vacuum. The product was obtained as an off-white solid.

### Synthesis of 5:

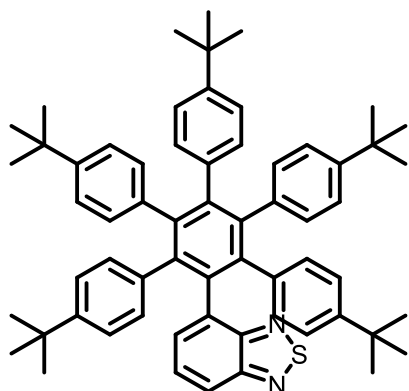

Compound **3** (100 mg, 1eq.) and 2,3,4,5 tetrakis(4(tertbutyl)phenyl)cyclopenta-2,4-diene-1-one **CPD** (206.4 mg, 1.1 eq) were reacted according to the general procedure. An off-white solid was isolated after precipitation and further purification was done by column (silica gel, *n*-hexane/CH<sub>2</sub>Cl<sub>2</sub>, 9:1, 237 mg, 85%).

**<sup>1</sup>H NMR (400 MHz, CDCl<sub>3</sub>):**  $\delta$  [ppm] = 7.55 (d, *J* = 8.6 Hz, 1 H), 7.21 (t, *J* = 7.8 Hz, 1 H), 7.13 (d, *J* = 6.8 Hz, 1 H), 6.78 - 6.87 (m, 6 H), 6.72 (br. s., 10 H), 6.63 (d, *J* = 8.1 Hz, 2 H), 6.58 (d, *J* = 8.1 Hz, 2 H), 1.07 - 1.13 (m, 27 H), 1.00 ppm (s, 18 H).

**<sup>13</sup>C NMR (100 MHz, CDCl<sub>3</sub>):**  $\delta$  [ppm] = 154.5, 154.2, 147.8, 147.5, 147.4, 141.5, 140.7, 140.6, 137.8, 137.6, 137.5, 135.4, 131.7, 131.1, 130.9, 131.0, 130.3, 128.7, 123.1, 123.0, 123.0, 122.6, 119.1, 34.1, 34.0, 33.9, 31.2, 31.0 .

**HR MS-ESI:** *m/z* calculated for C<sub>62</sub>H<sub>69</sub>N<sub>2</sub>S [M+H]<sup>+</sup>: 873.5181, found: 873.5135.

Melting point: 310 °C.

### Synthesis of 6:

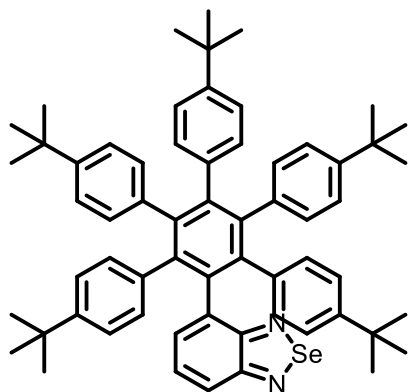

Compound **4** (50 mg, 1 eq.) and 2,3,4,5 tetrakis(4(tertbutyl)phenyl)cyclopenta-2,4-diene-1-one **CPD** (90 mg, 1.1 eq) were reacted according to the general procedure. An off-white solid was isolated after precipitation and further purification was done by column (silica gel, *n*-hexane/ CH<sub>2</sub>Cl<sub>2</sub>, 9:1, 102 mg, 80%).

<sup>1</sup>H NMR (400MHz, CDCl<sub>3</sub>): δ [ppm] = 7.38 (d, *J* = 8.8 Hz, 1 H), 7.11 (t, 1 H), 6.99 (d, *J* = 5.9 Hz, 1 H), 6.82 (m, 6 H), 6.69 - 6.75 (m, 10 H), 6.64 (d, *J* = 8.1 Hz, 2 H), 6.58 (d, *J* = 7.9 Hz, 2 H), 1.11 (s, 9 H), 1.09 (s, 18 H), 1.00 (s, 18 H)

<sup>13</sup>C NMR (100 MHz, CDCl<sub>3</sub>): δ [ppm] = 160.1, 160.0, 147.8, 147.5, 147.4, 141.4, 140.6, 140.5, 137.8, 137.6, 136.8, 135.8, 131.7, 131.1, 130.9, 131.0, 130.3, 130.2, 129.1, 123.1, 123.1, 124.9, 122.6, 121.2, 34.0, 34.0, 31.2, 31.0.

**HRMS-ESI:** *m/z* calculated for C<sub>62</sub>H<sub>69</sub>N<sub>2</sub>Se [M+H]<sup>+</sup>: 921.4626, found: 921.4658.

Melting point: 312 °C.

#### General procedure for the synthesis of SNG and SeNG:

Round bottom flask (100 mL) equipped with a magnetic stirring bar was charged with **5** or **6** 1 eq., 6 eq. DDQ and CH<sub>2</sub>Cl<sub>2</sub> (40 mL for 100 mg reaction). The mixture was degassed via N<sub>2</sub>-bubbling for 20 min and meanwhile cooled to 0 °C. Later, 0.15 mL of triflic acid was added in one portion and the flask was closed with a rubber septum under N<sub>2</sub>. The reaction mixture was stirred for 2h at 0 °C and after that, MeOH (30 mL) and NEt<sub>3</sub> (10 mL) were added. All solvents were evaporated and the crude was filtered over a pad of silica gel with *n*-hexane/CH<sub>2</sub>Cl<sub>2</sub> (1:1). Final purification was achieved by column chromatography over silica gel with *n*-hexane/CH<sub>2</sub>Cl<sub>2</sub>.

#### Procedure for synthesis of SNG:

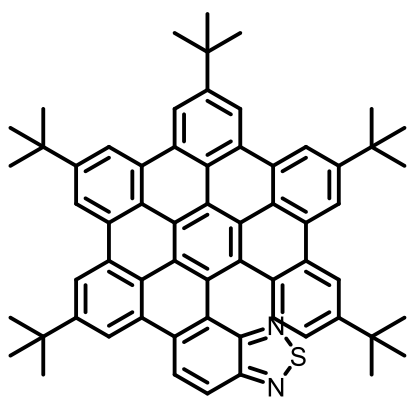



**5** (100 mg) was reacted according to the general procedure. An orange crystalline solid was isolated after column chromatography (silica gel, *n*-hexane/CH<sub>2</sub>Cl<sub>2</sub>, 9:1, 79 mg, 80%).

**<sup>1</sup>H NMR (500 MHz, CDCl<sub>3</sub>):**  $\delta$  [ppm] = 9.34 (s, 1 H), 9.31 (s, 1 H), 9.28 (s, 1 H), 9.27 (s, 1 H), 9.25 (s, 2 H), 9.19-9.17 (m, 3 H), 8.79 (s, 1 H), 8.26 (d, *J* = 9.2 Hz, 1 H), 7.85 (d, *J* = 8.5 Hz, 1 H), 6.89 (dd, *J* = 8.5, 1.8 Hz, 1 H), 1.82 - 1.85 (m, 36 H), 1.46 (s, 9 H)

**<sup>13</sup>C NMR (125 MHz, CDCl<sub>3</sub>):**  $\delta$  [ppm] = 154.4, 153.5, 149.6, 149.4, 149.4, 149.1, 148.9, 130.7, 130.6, 130.4, 130.0, 129.9, 129.8, 129.3, 129.1, 128.8, 127.5, 124.8, 124.8, 124.0, 123.7, 123.6, 123.2, 123.0, 122.6, 121.6, 120.3, 120.0, 119.6, 119.3, 119.2, 119.1, 118.9, 118.8, 117.9, 35.9, 35.8, 35.7, 34.9, 32.0, 31.4.

**MALDI-TOF:** *m/z* calculated for C<sub>62</sub>H<sub>58</sub>N<sub>2</sub>S [M+H]<sup>+</sup>: 862.4321, found: 862.8814.

Melting point: Stable up to ~320 °C, after that slowly decomposes.

#### Procedure for synthesis of SeNG:

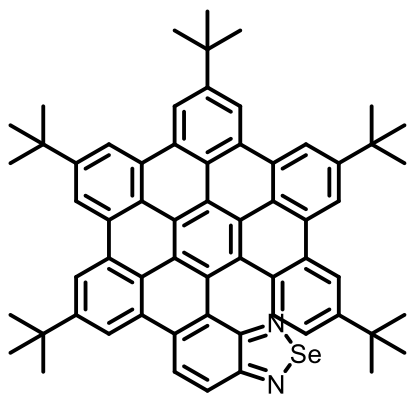

**6** (50 mg) was reacted according to the general procedure. A reddish crystalline solid was isolated after column chromatography (silica gel, *n*-hexane/CH<sub>2</sub>Cl<sub>2</sub>, 9:1, 40.5 mg, 82%).

**<sup>1</sup>H NMR (500MHz, CDCl<sub>3</sub>):**  $\delta$  [ppm] = 9.34 (s, 1 H), 9.28 (s, 1 H), 9.30 (s, 1 H), 9.21-9.27 (m, 3 H), 9.14 (s, 2 H), 9.09 (d, *J* = 9.8 Hz, 1 H), 8.75 (s, 1 H), 8.10 (d, *J* = 9.5 Hz, 1 H), 7.91 (d, *J* = 8.5 Hz, 1 H), 6.90 (dd, *J* = 8.7, 1.7 Hz, 1 H), 1.81 - 1.84 (m, 36 H), 1.45 (s, 9 H).

**<sup>13</sup>C NMR (125 MHz, CDCl<sub>3</sub>):**  $\delta$  [ppm] = 159.8, 158.4, 149.6, 149.4, 149.0, 148.7, 130.7, 130.5, 130.4, 129.9, 129.8, 129.6, 129.2, 128.9, 128.7, 127.8, 126.3, 125.0, 124.1, 123.7, 123.6, 123.3, 123.1, 122.4, 122.1, 121.5, 120.3, 119.5, 119.3, 119.2, 119.1, 118.9, 118.8, 118.8, 118.3, 35.8, 35.7, 34.8, 32.0, 31.4.

**MALDI-TOF:** m/z calculated for  $C_{62}H_{58}N_2Se$   $[M+H]^+$ : 910.3765, found: 910.9074.

Melting point: Stable up to  $\sim 320$  °C, after that slowly decomposes.

$^1\text{H}$ ,  $^{13}\text{C}$  NMR, and Mass Spectra

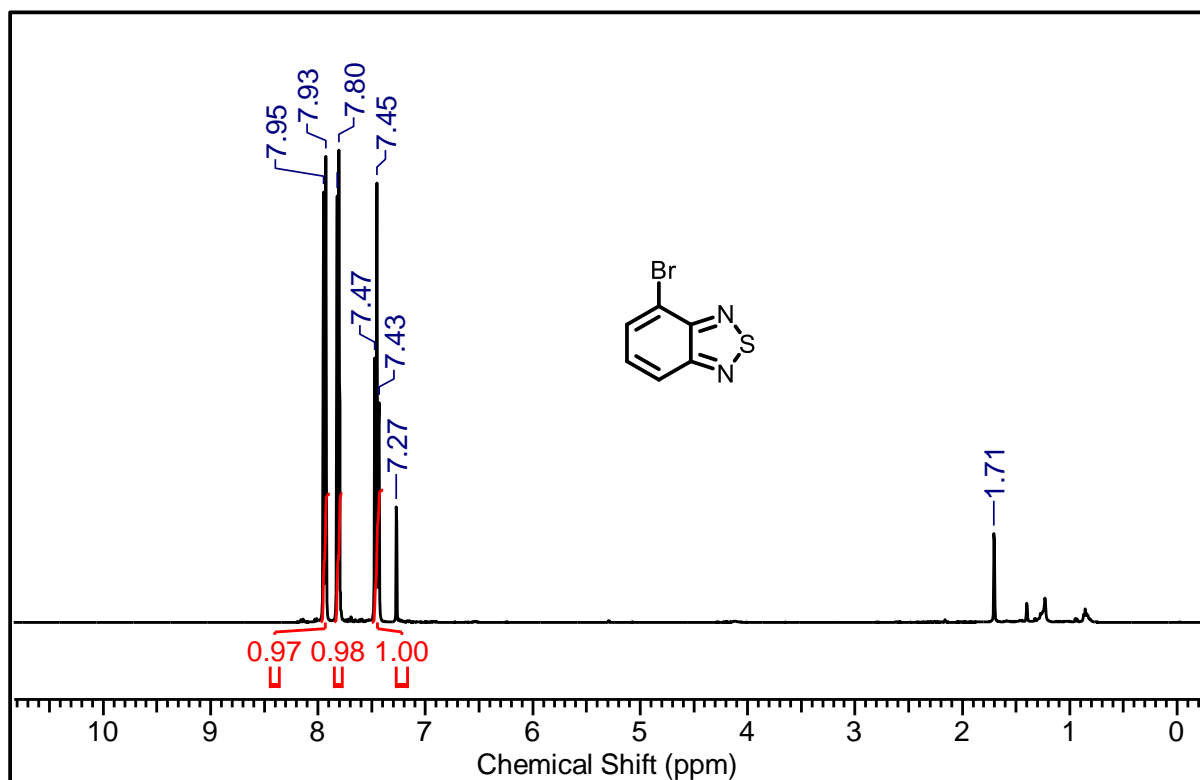

$^1\text{H}$  NMR (400 MHz) spectrum of 2 in  $\text{CDCl}_3$  at 298 K

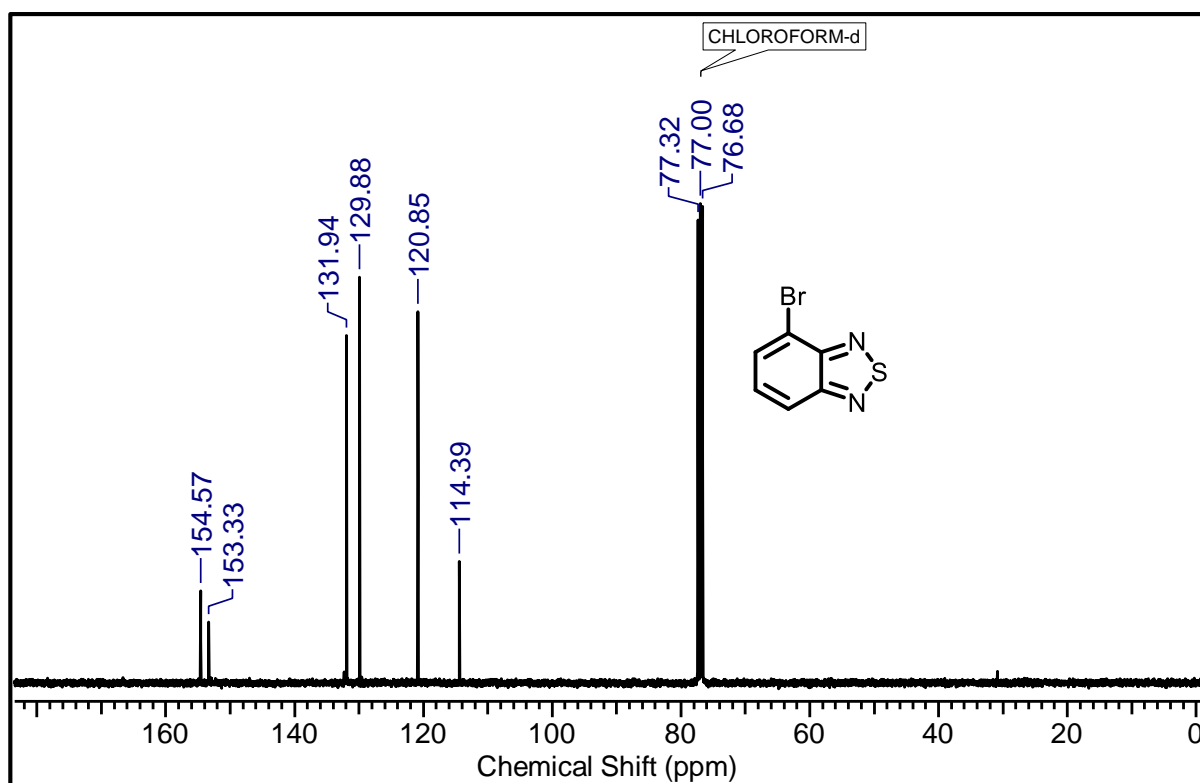

$^{13}\text{C}$  NMR (100 MHz) spectrum of 2 in  $\text{CDCl}_3$  at 298 K

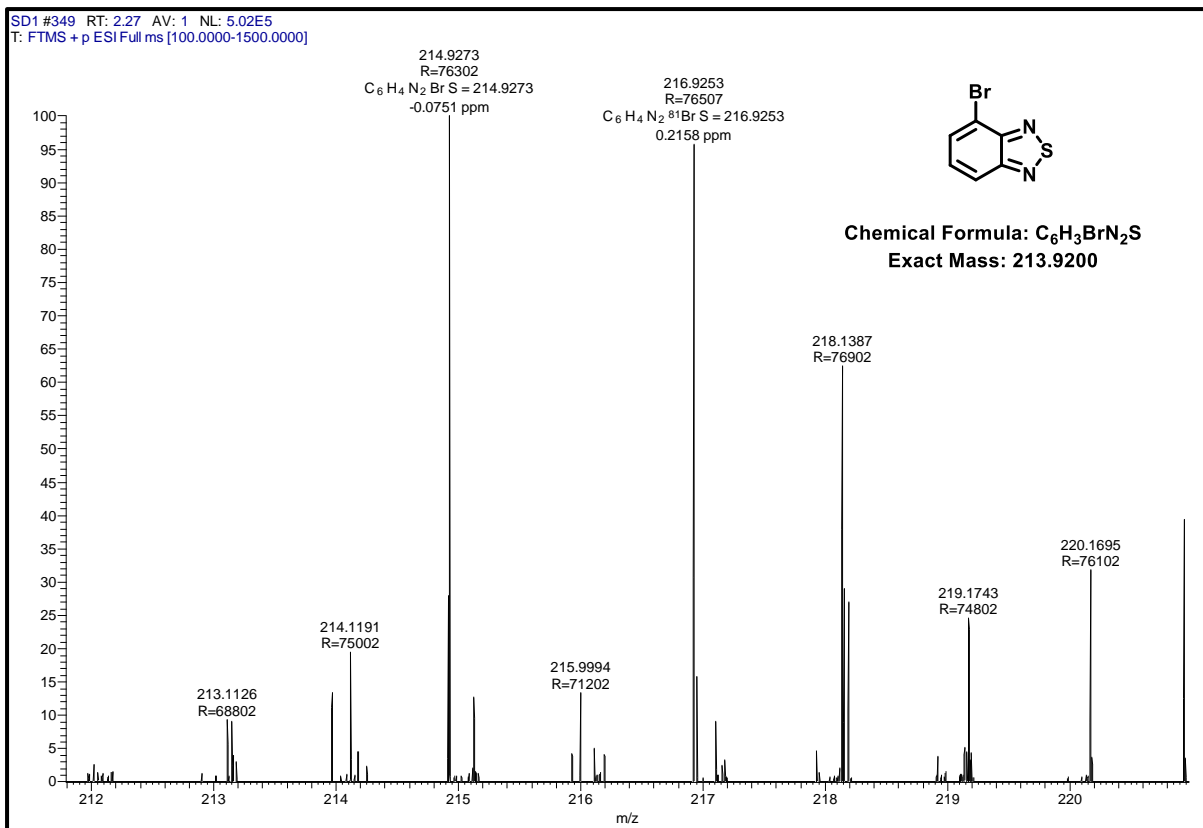

HR MS-ESI spectrum of 2

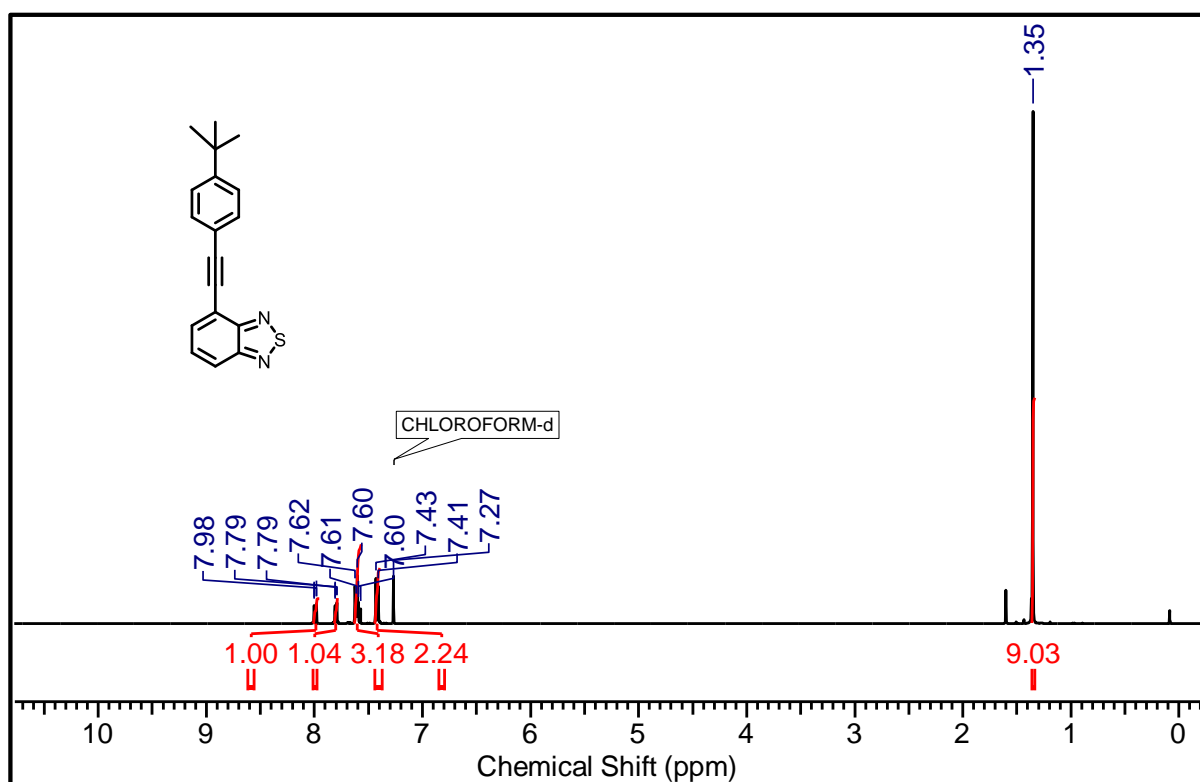

$^1H$  NMR (400 MHz) spectrum of 3 in  $CDCl_3$  at 298 K

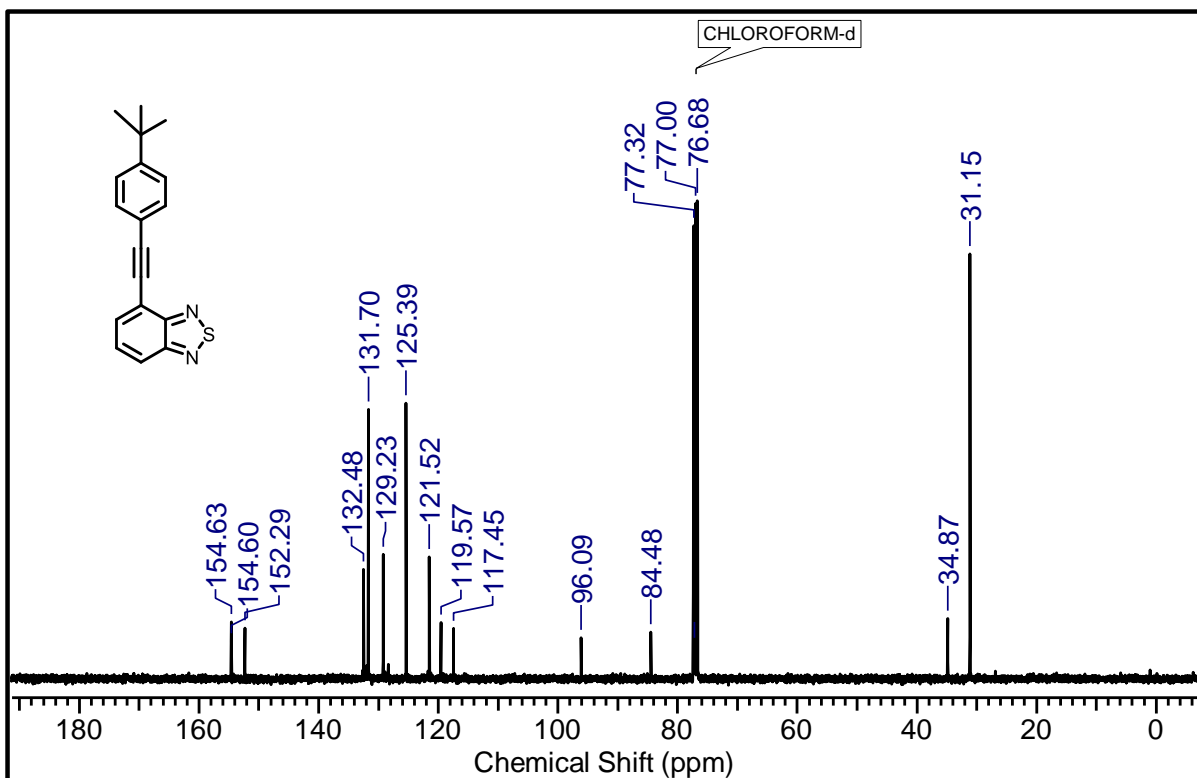

<sup>13</sup>C NMR (100 MHz) spectrum of 3 in CDCl<sub>3</sub> at 298 K

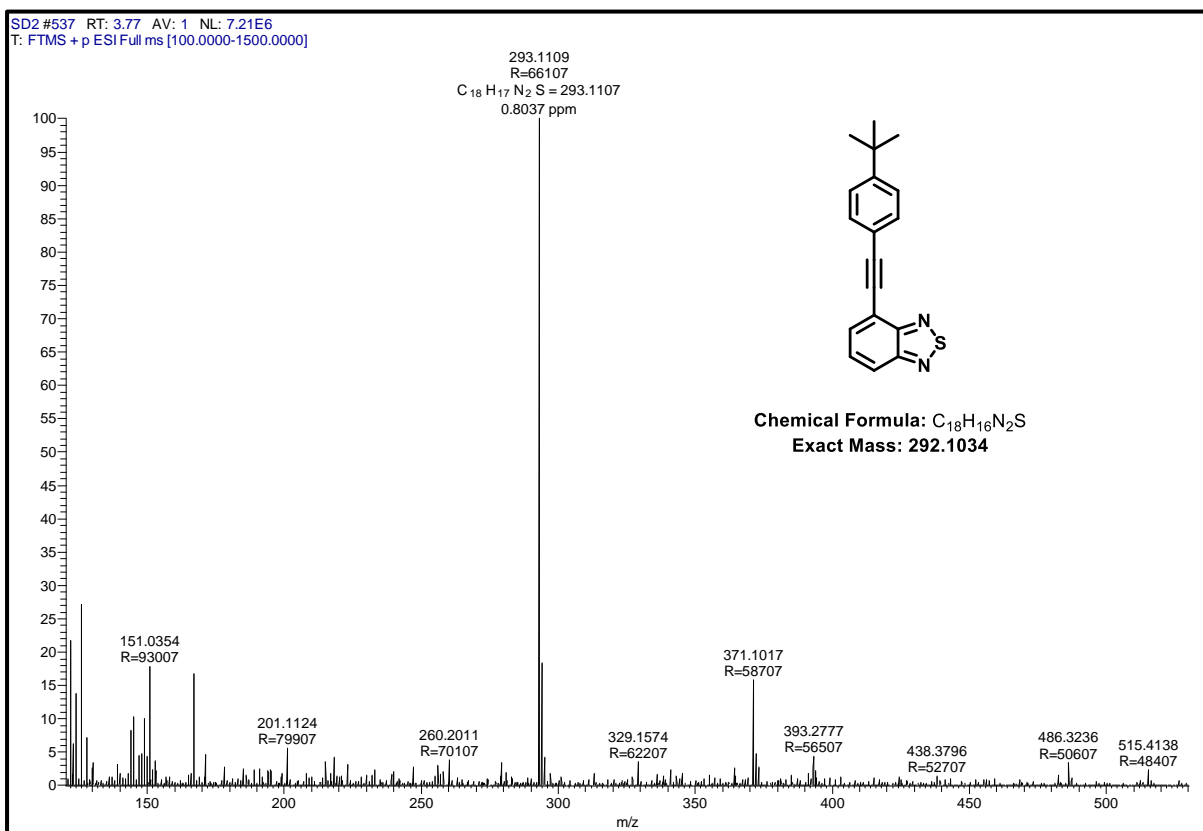

HR MS-ESI spectrum of 3

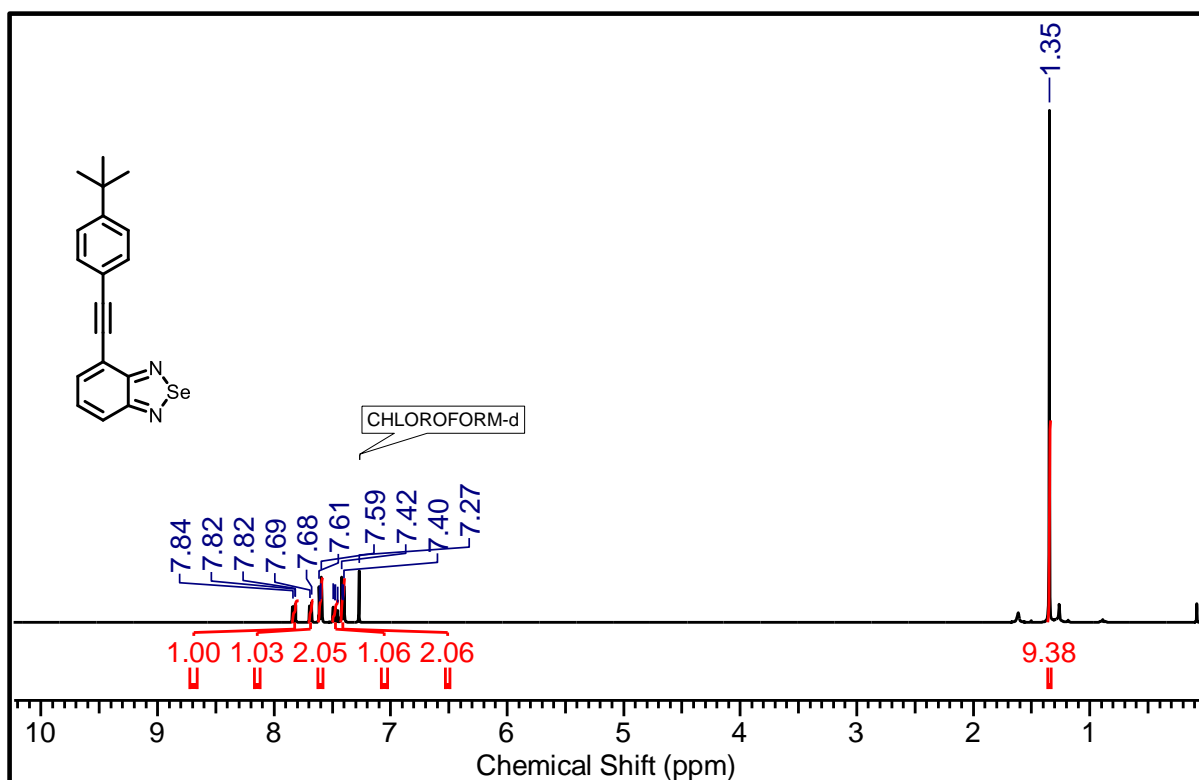

$^1\text{H}$  NMR (400 MHz) spectrum of 4 in  $\text{CDCl}_3$  at 298 K

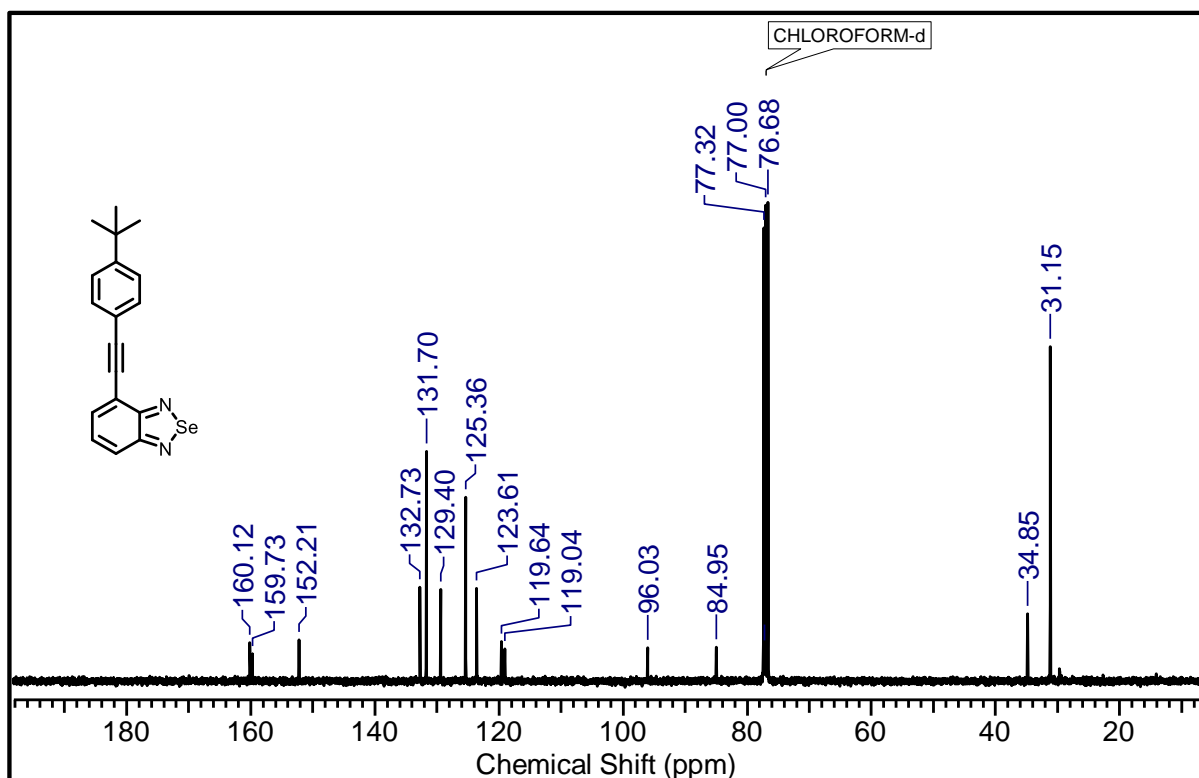

$^{13}\text{C}$  NMR (100 MHz) spectrum of 4 in  $\text{CDCl}_3$  at 298 K

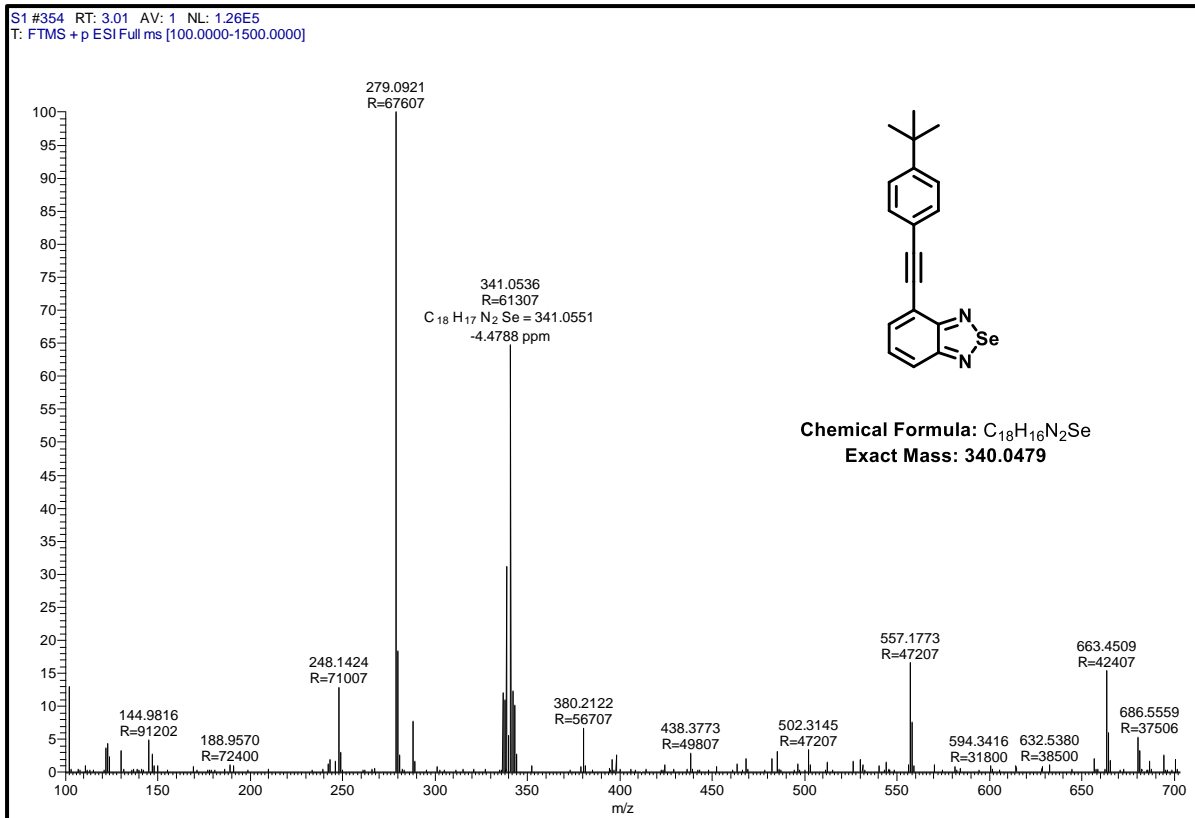

HR MS-ESI spectrum of 4

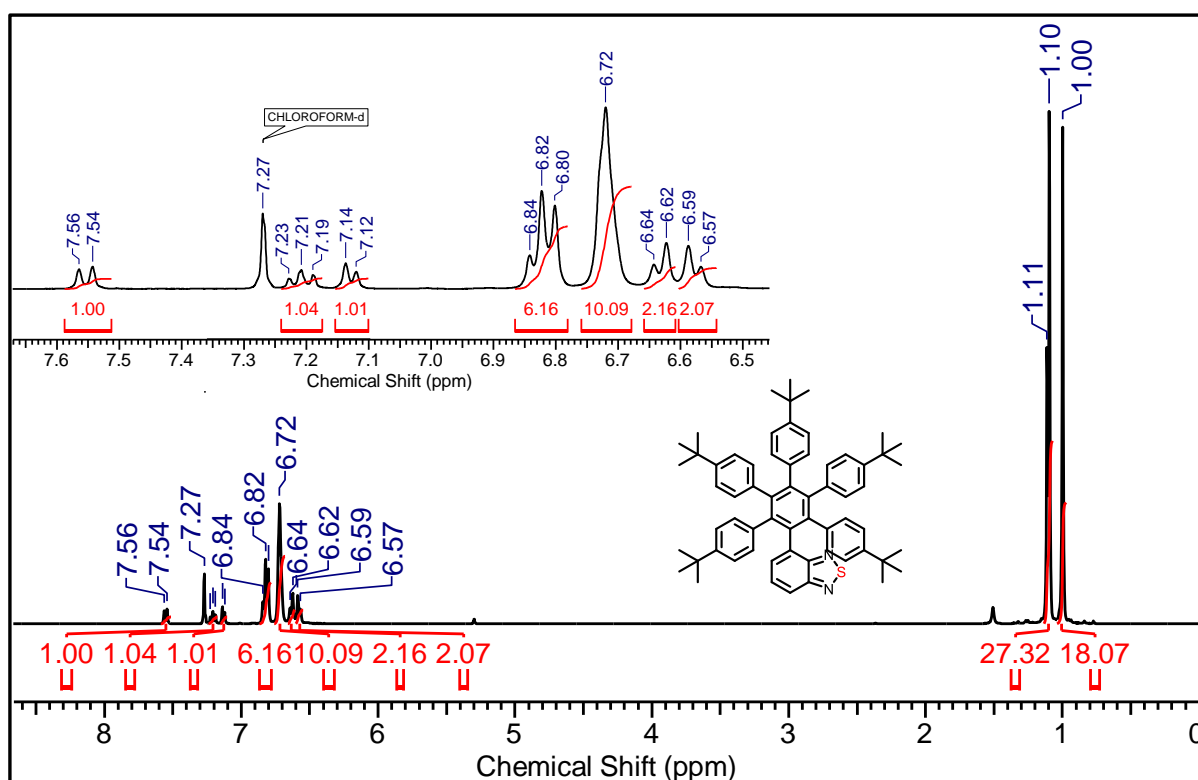

$^1H$  NMR (400 MHz) spectrum of 5 in  $CDCl_3$  at 298 K

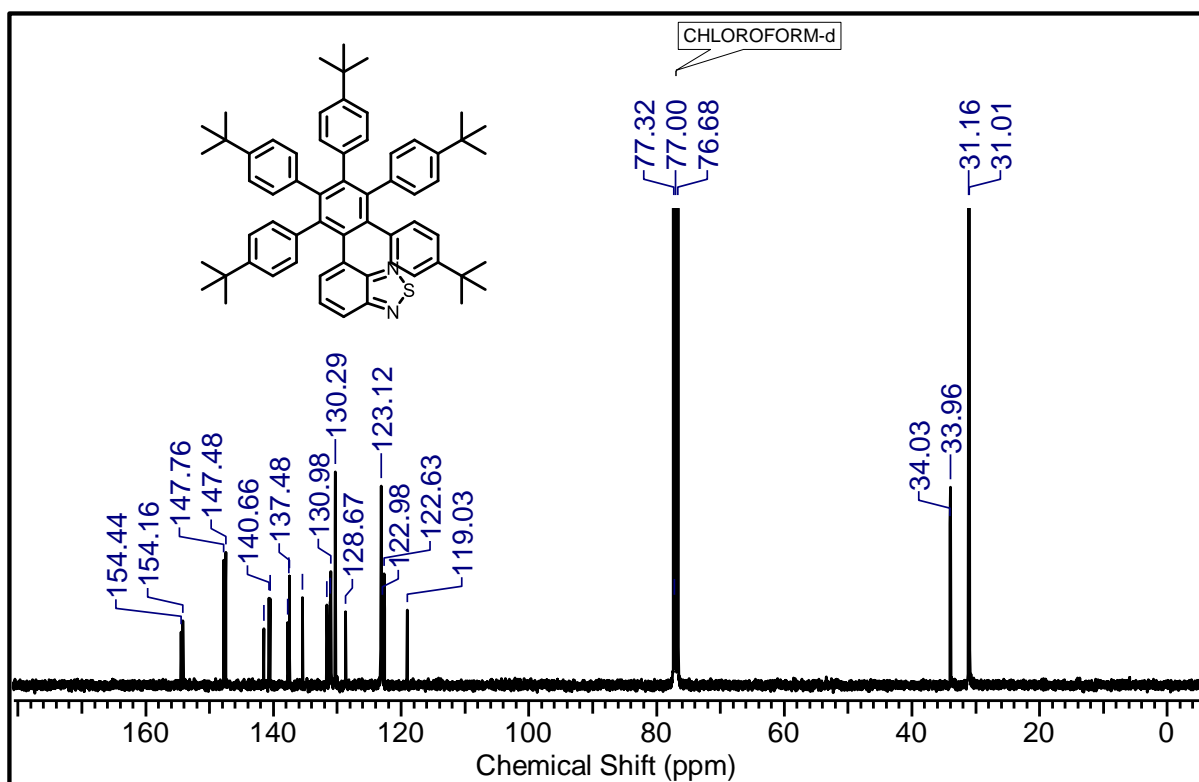

$^{13}\text{C}$  NMR (101 MHz) spectrum of 5 in  $\text{CDCl}_3$  at 298 K

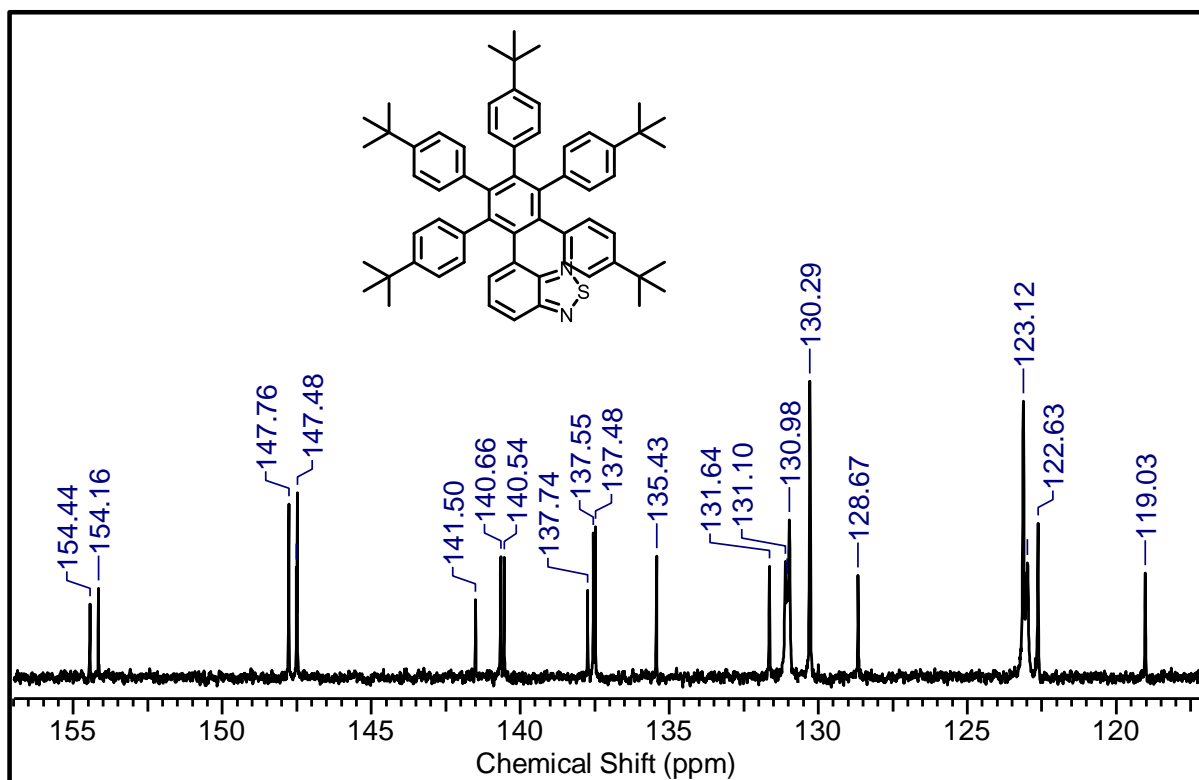

$^{13}\text{C}$  NMR (100 MHz) cutout (aromatic region) spectrum of 5



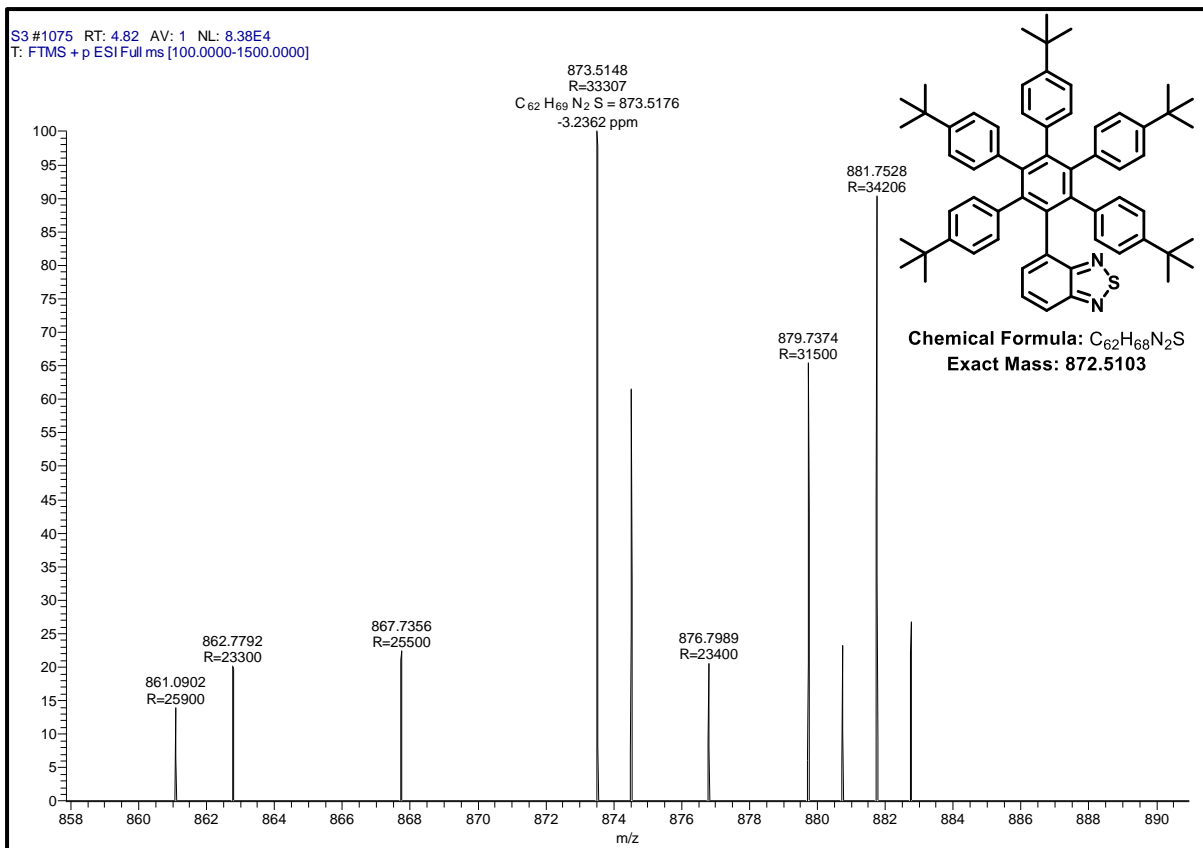

HR MS-ESI spectrum of 5

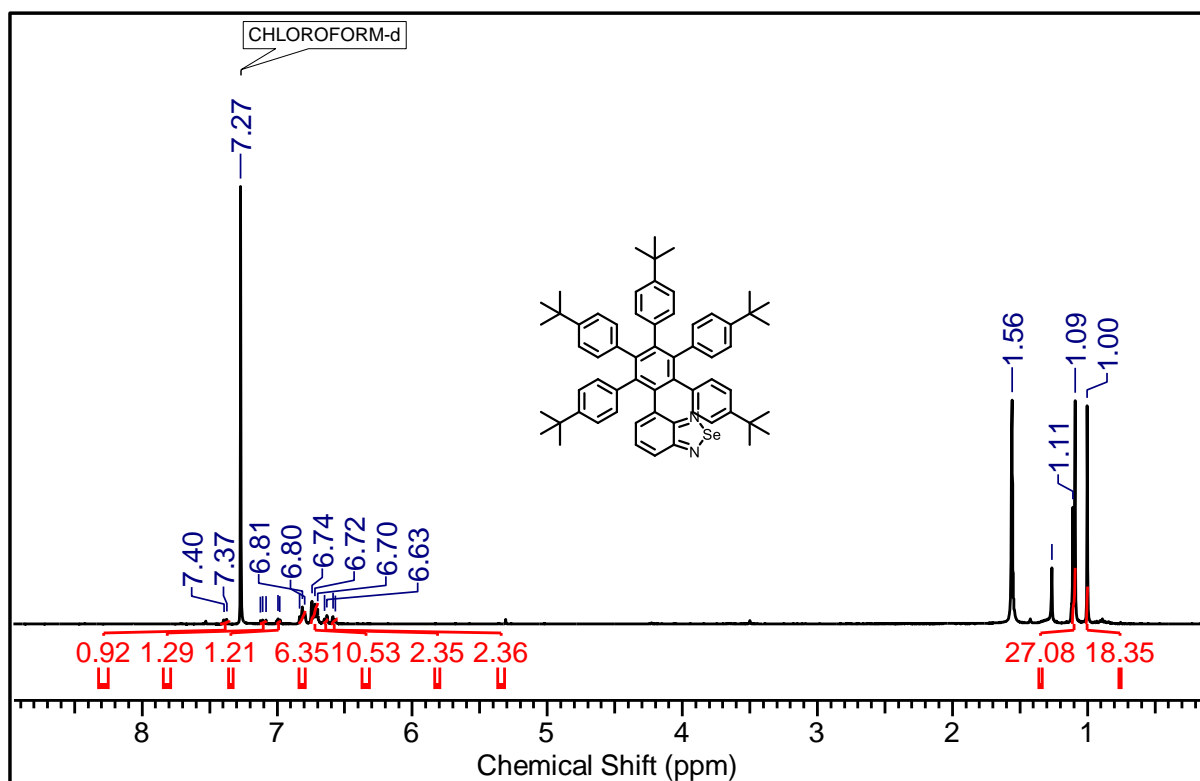

<sup>1</sup>H NMR (400 MHz) spectrum of 6 in CDCl<sub>3</sub> at 298 K

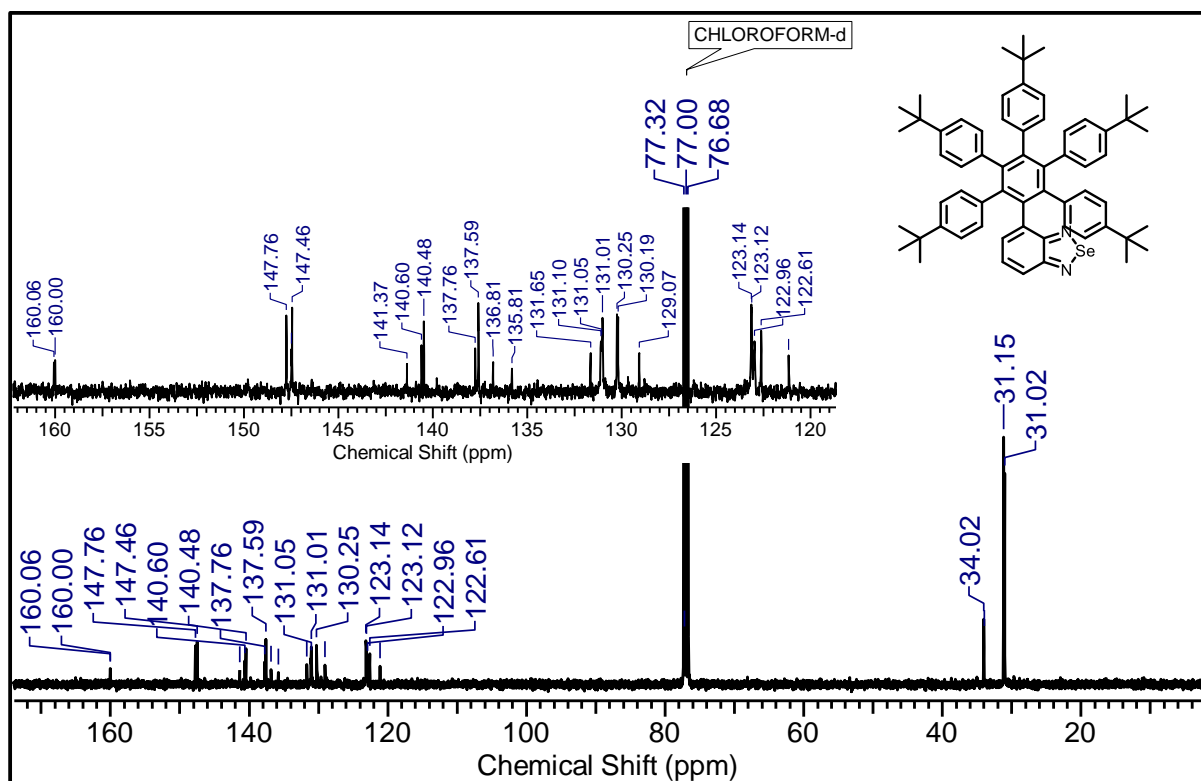

$^{13}\text{C}$  NMR (100 MHz) spectrum of **6** in  $\text{CDCl}_3$  at 298 K

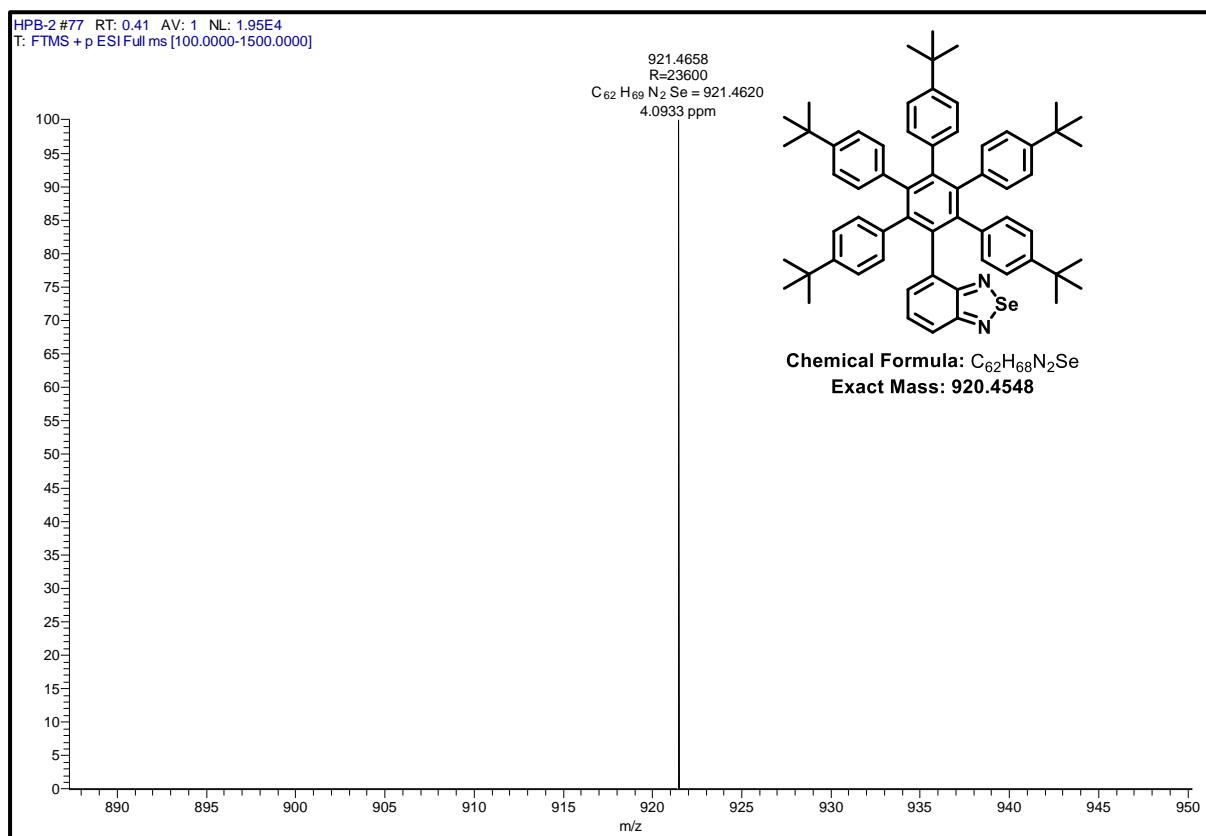

HR MS-ESI spectrum of **6**

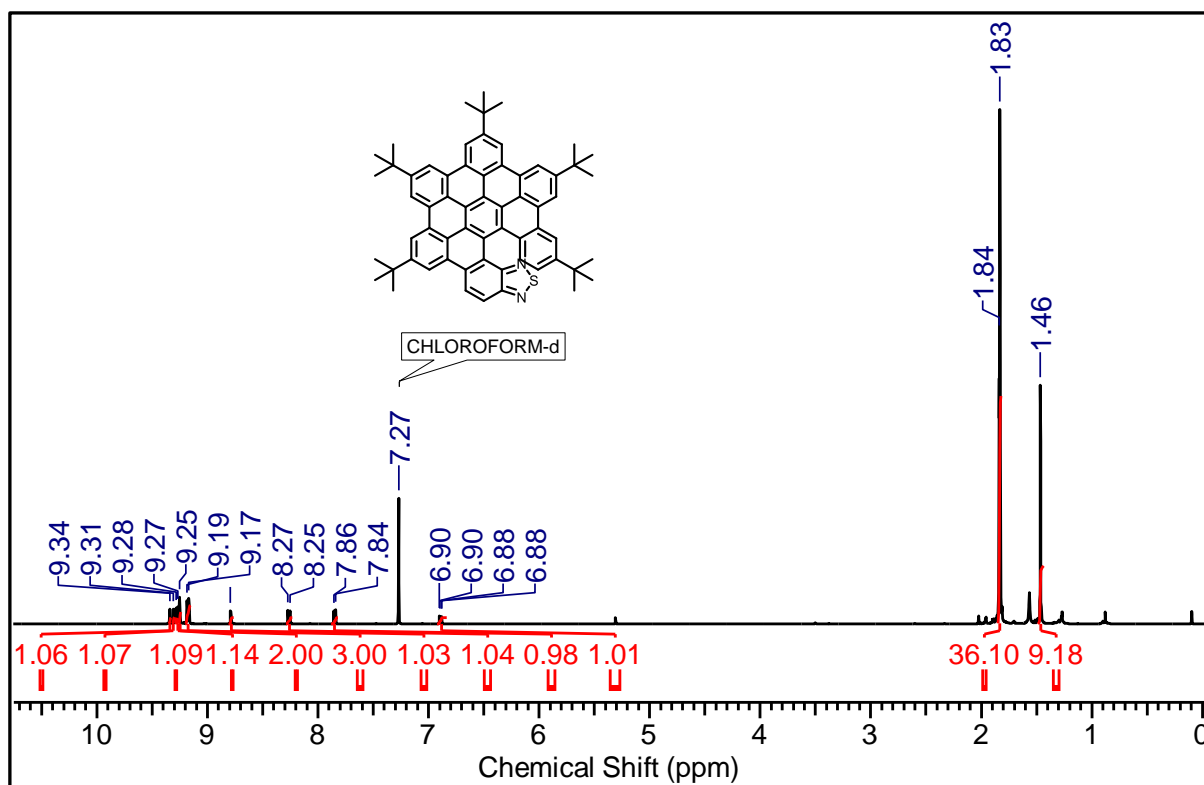

**$^1\text{H}$  NMR (500 MHz) spectrum of SNG in  $\text{CDCl}_3$  at 298 K**

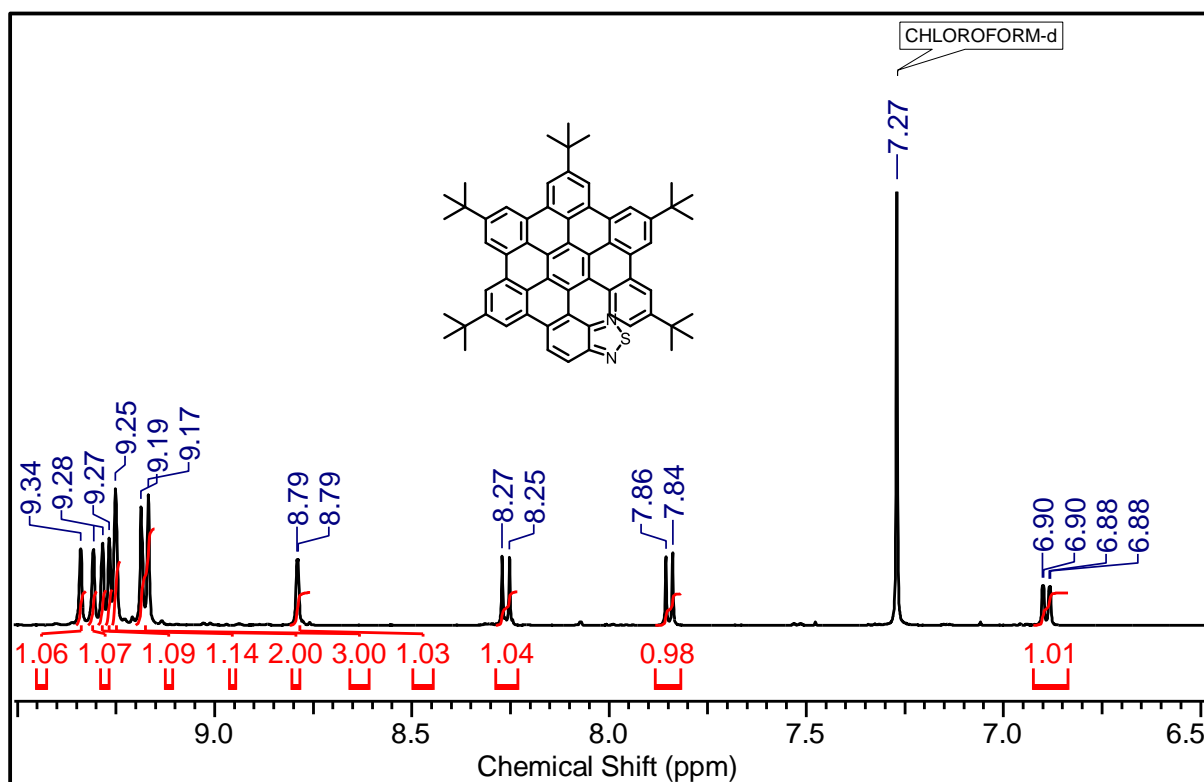

**$^1\text{H}$  NMR (500 MHz) cutout (aromatic region) spectrum of SNG**

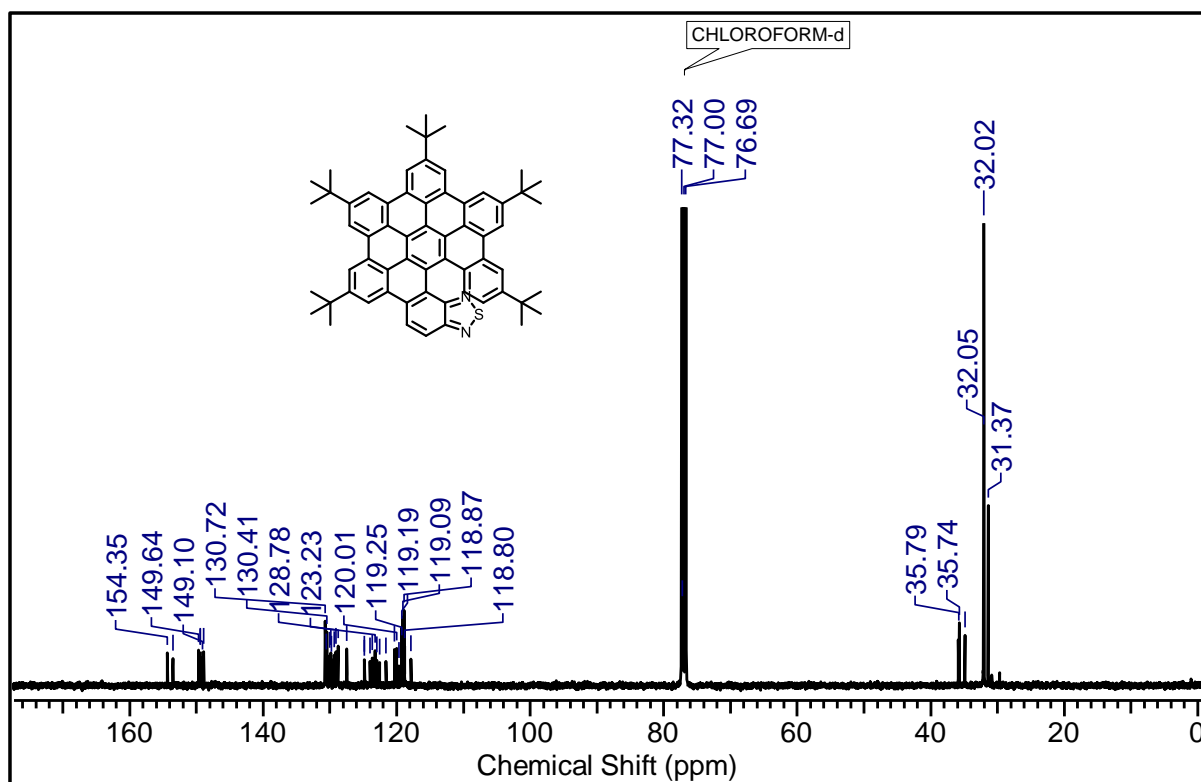

$^{13}\text{C}$  NMR (125 MHz) spectrum of SNG in  $\text{CDCl}_3$  at 298 K

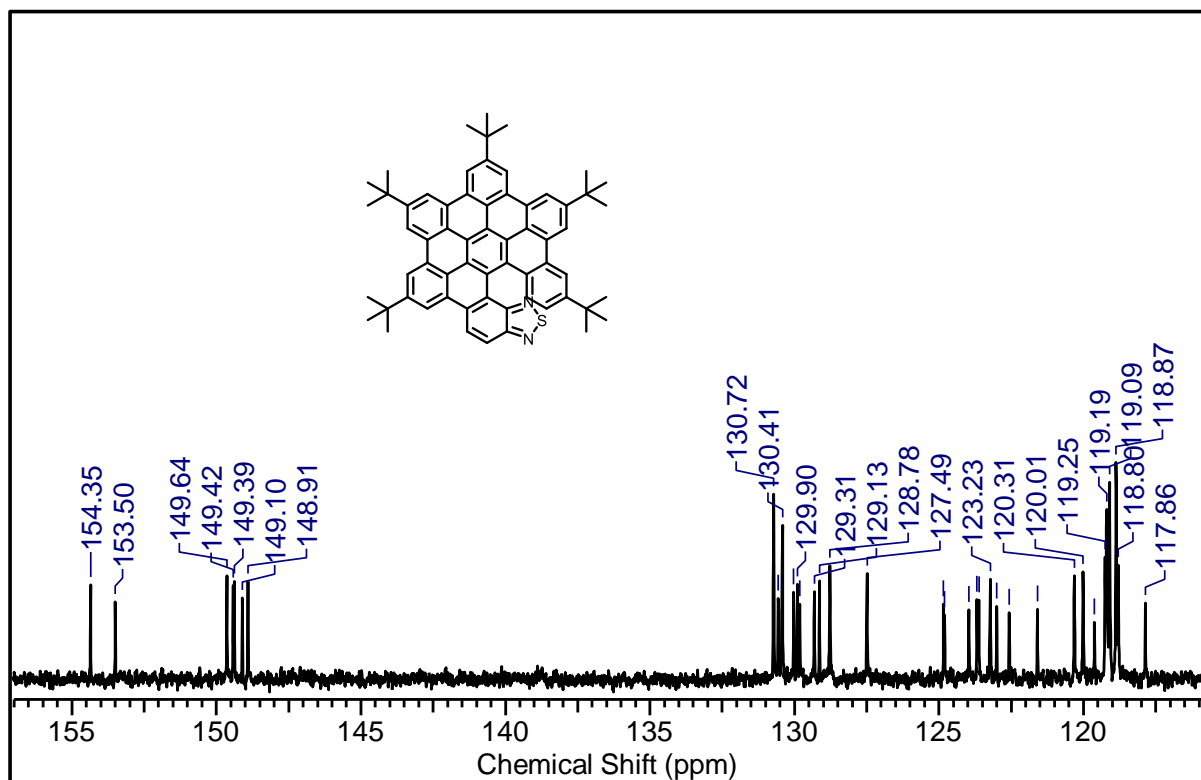

$^{13}\text{C}$  NMR (125 MHz) aromatic region cutout of SNG in  $\text{CDCl}_3$  at 298 K

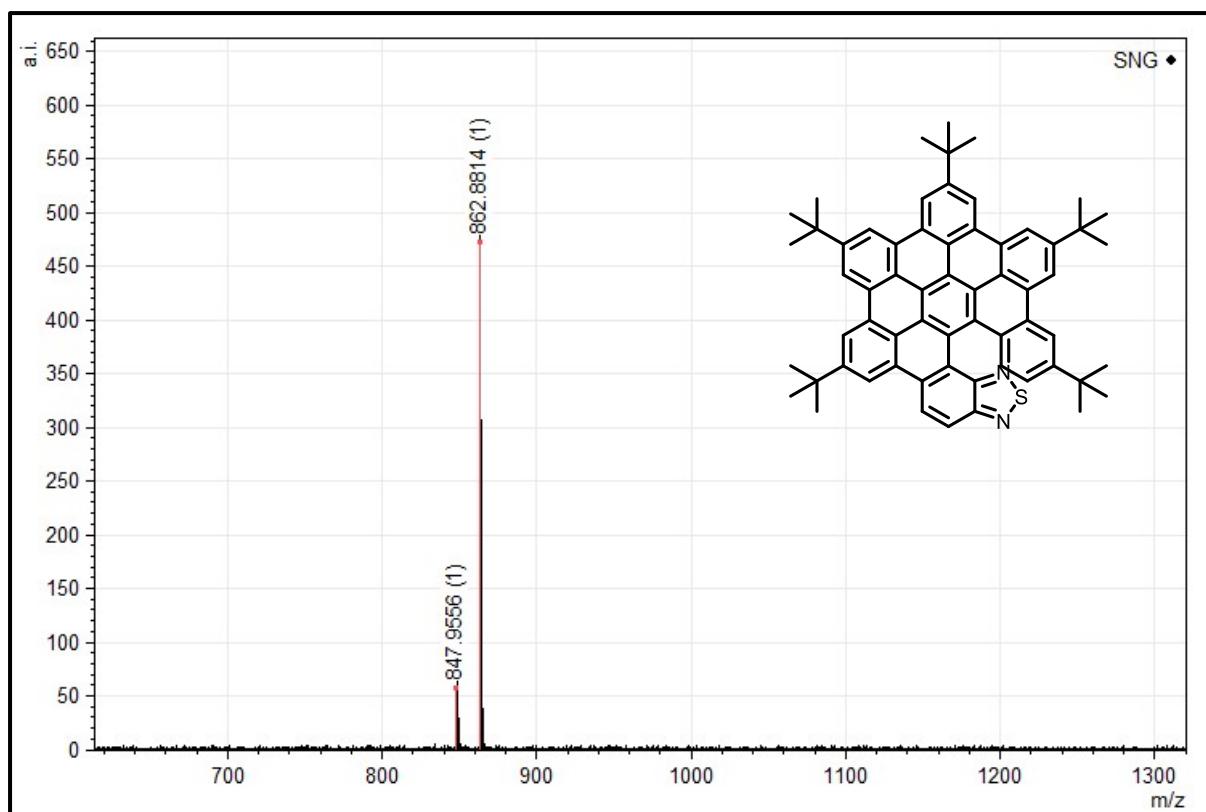

MALDI-TOF MS spectra of SNG

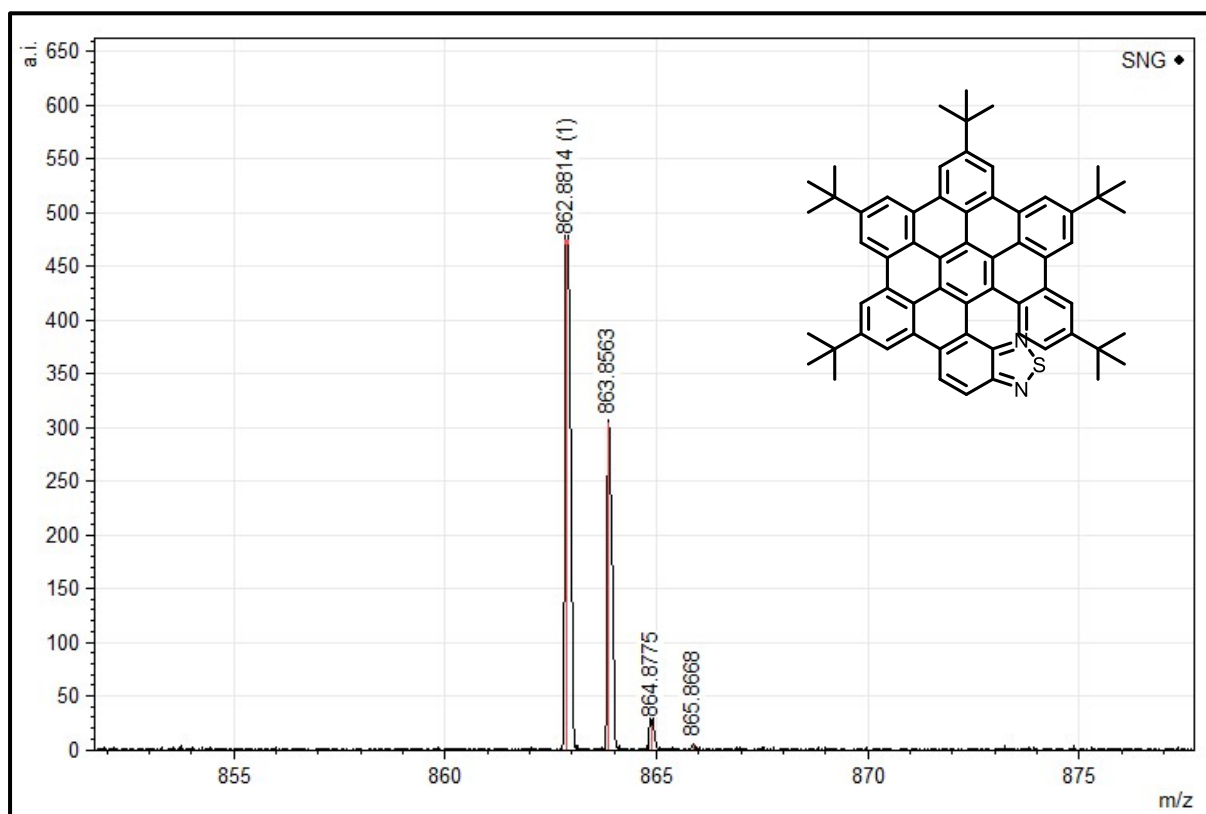

MALDI-TOF MS Zoomed spectra of SNG

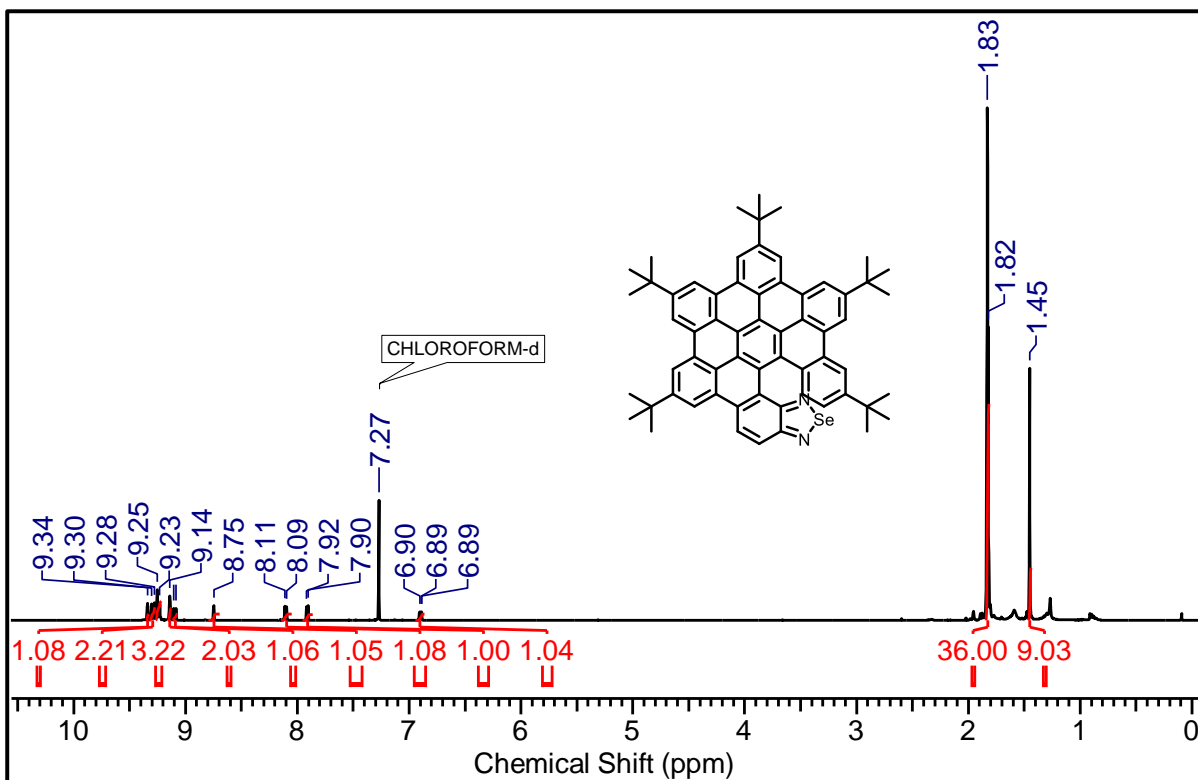

$^1\text{H}$  NMR (500 MHz) spectrum of SeNG in  $\text{CDCl}_3$  at 298 K

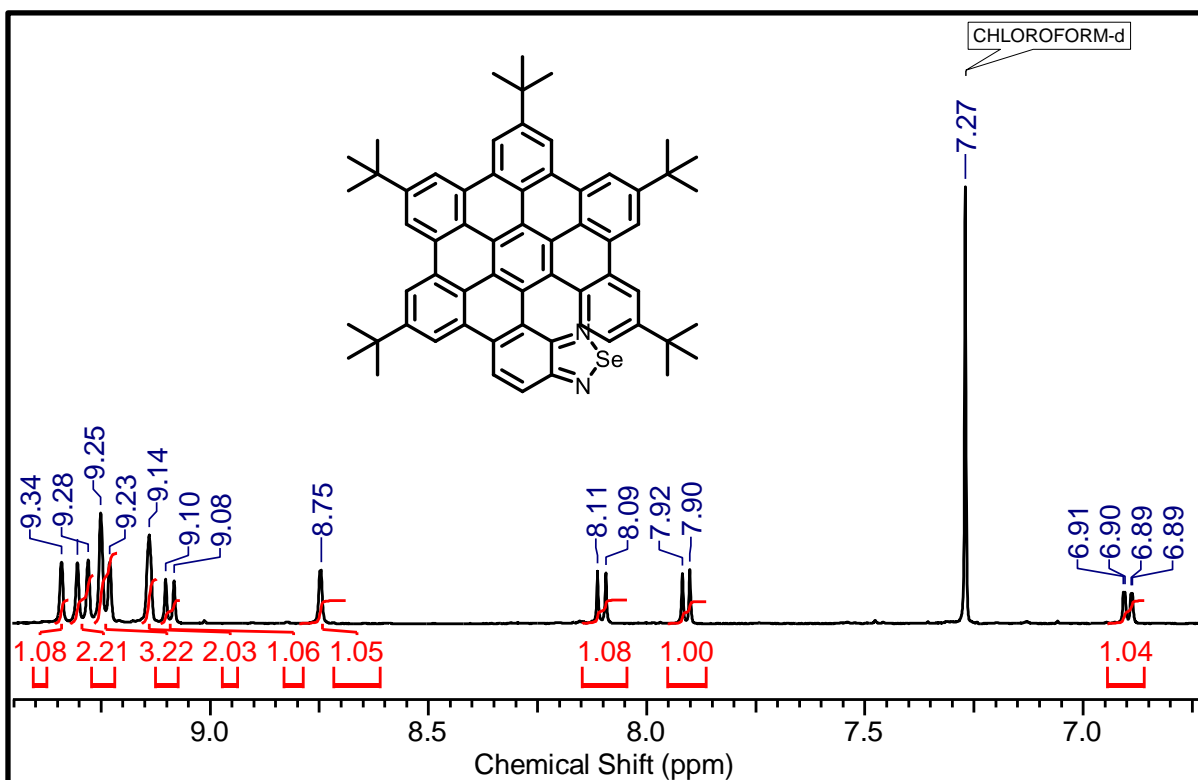

$^1\text{H}$  NMR (500 MHz) cutout (aromatic region) spectrum of SeNG

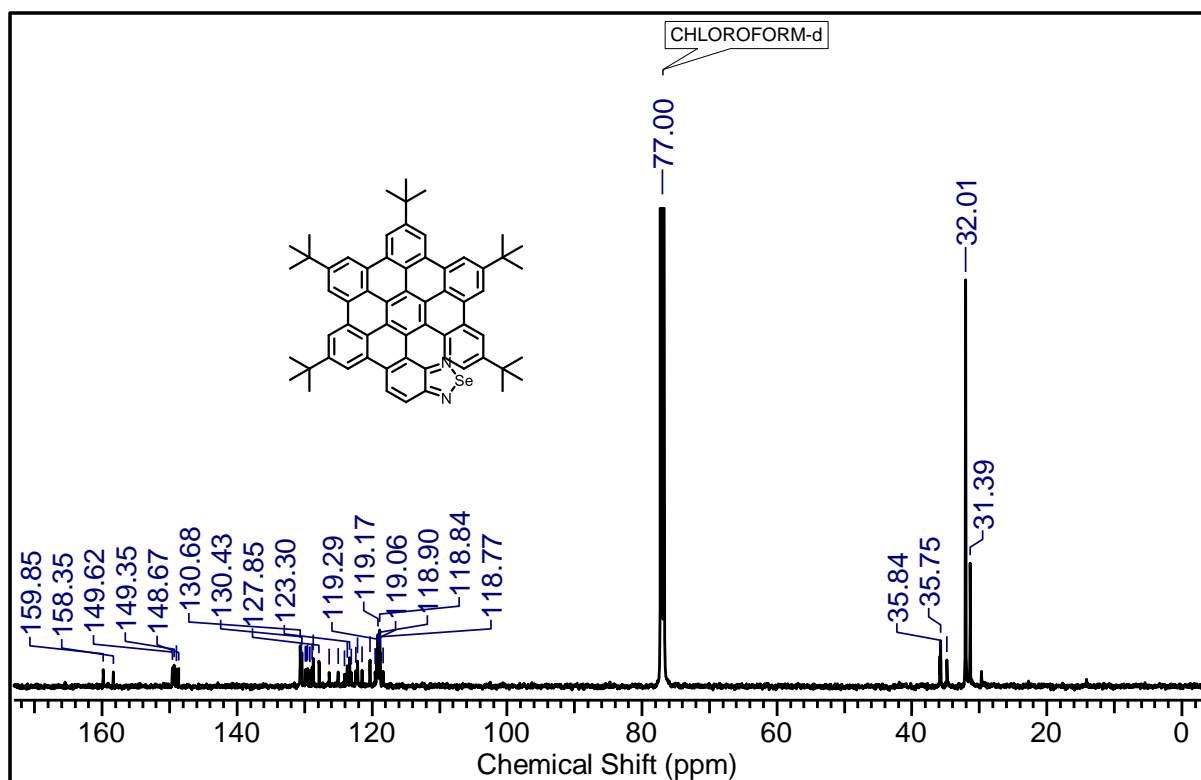

$^{13}\text{C}$  NMR (125 MHz) spectrum of SeNG in  $\text{CDCl}_3$  at 298 K

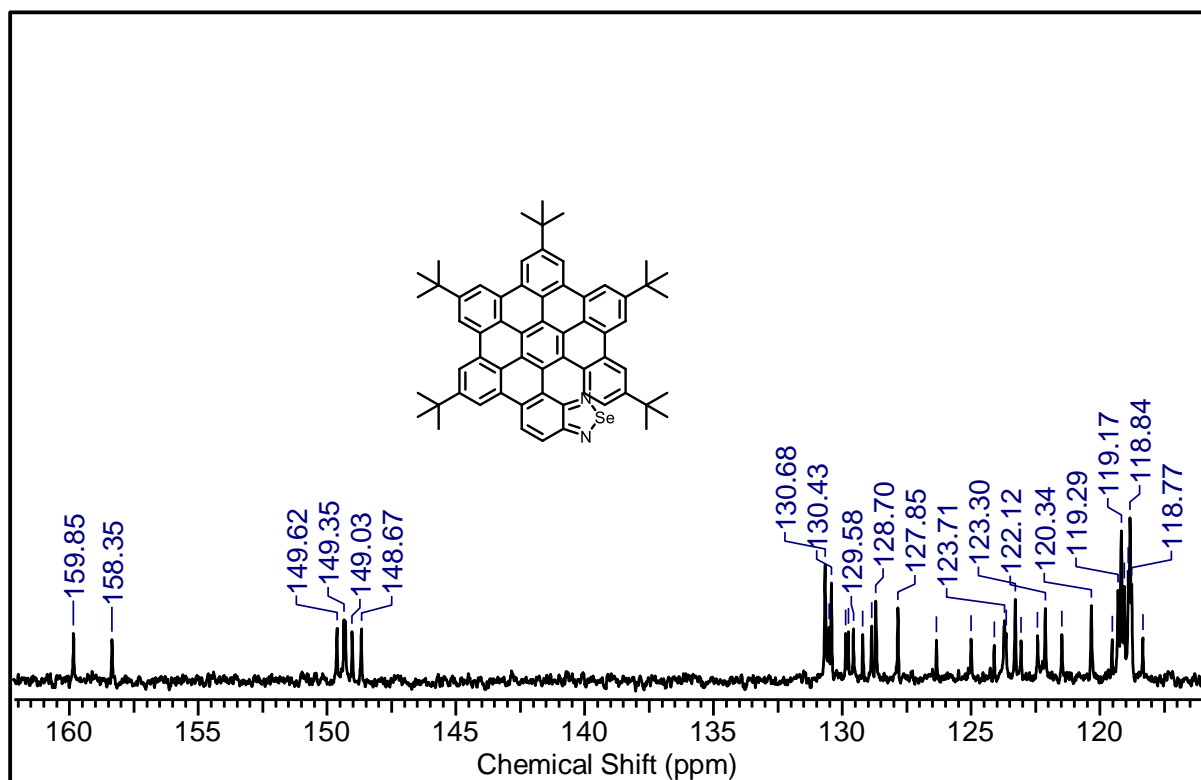

$^{13}\text{C}$  NMR (125 MHz) aromatic region cutout of SeNG in  $\text{CDCl}_3$  at 298 K

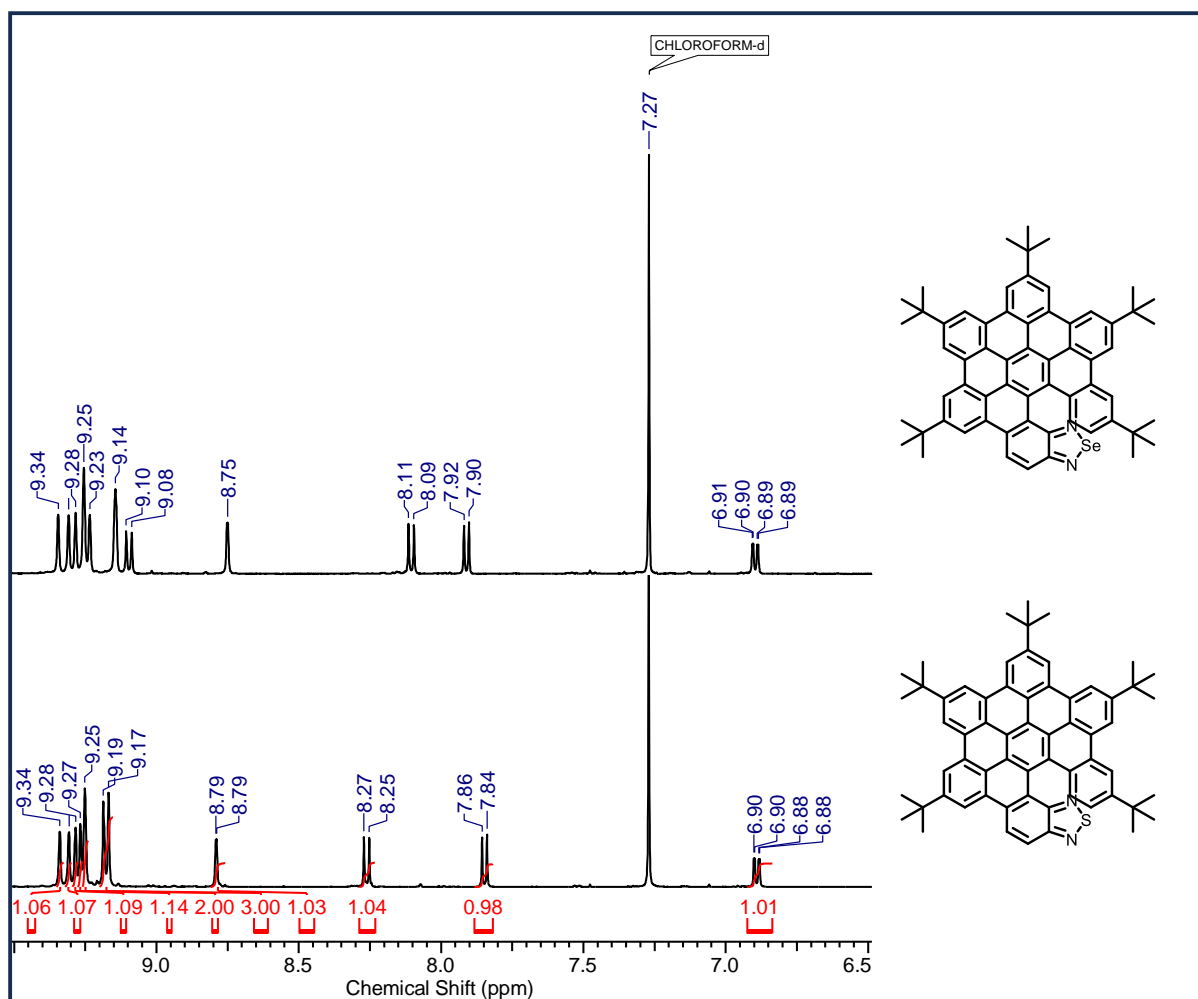

Comparison of  $^1\text{H}$  NMR spectrum (aromatic region) of SNG and SeNG



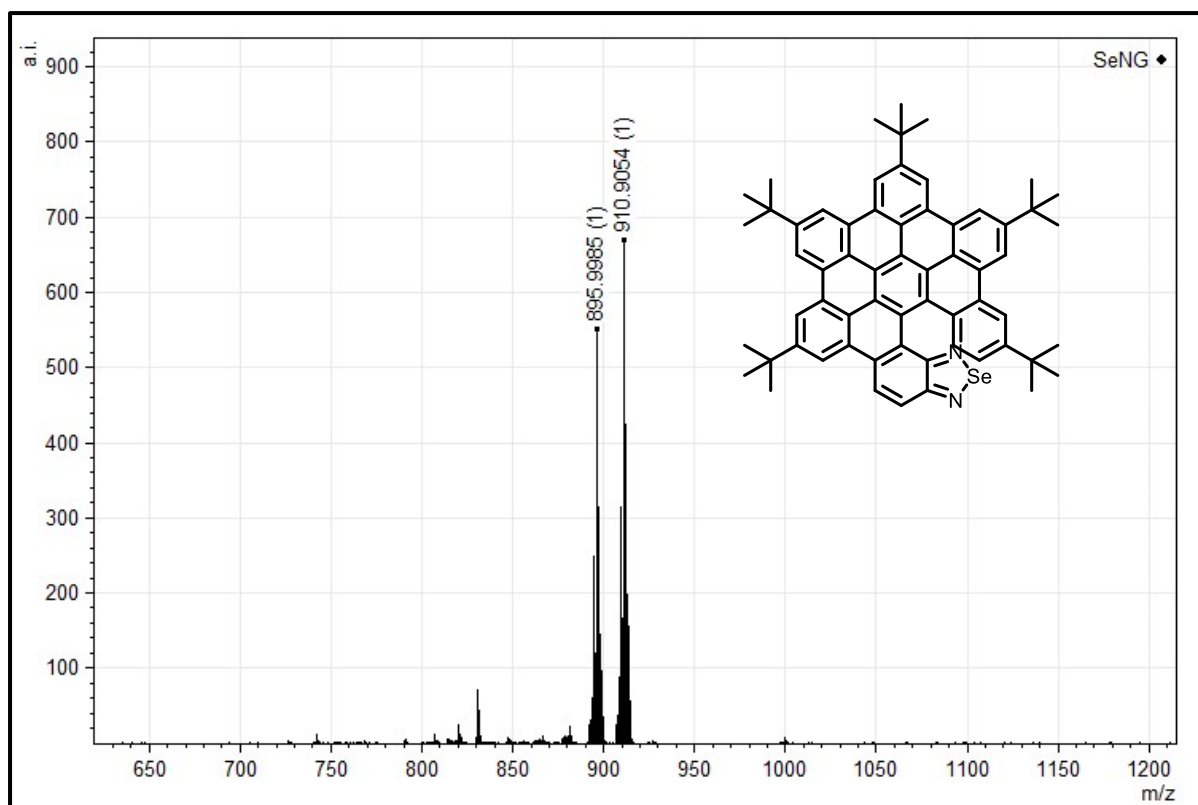

MALDI-TOF MS spectra of SeNG

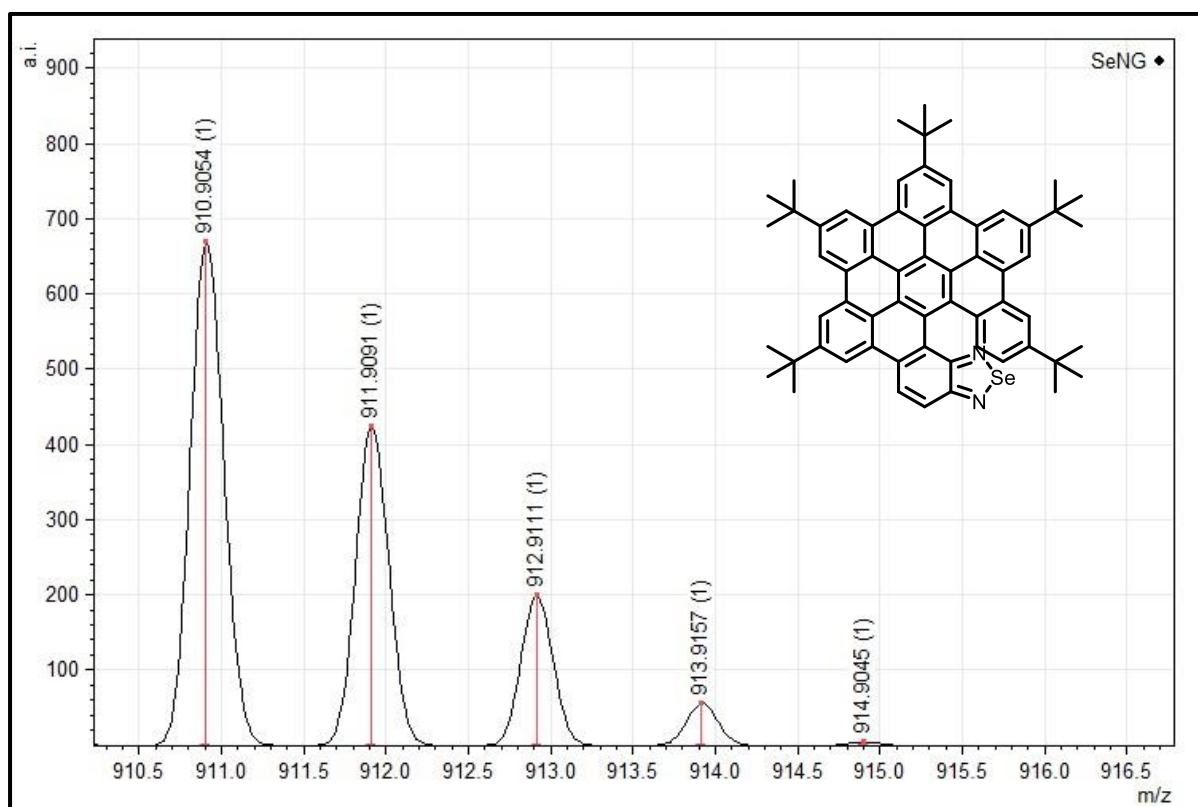

MALDI-TOF MS Zoomed spectra of SeNG

## Figures

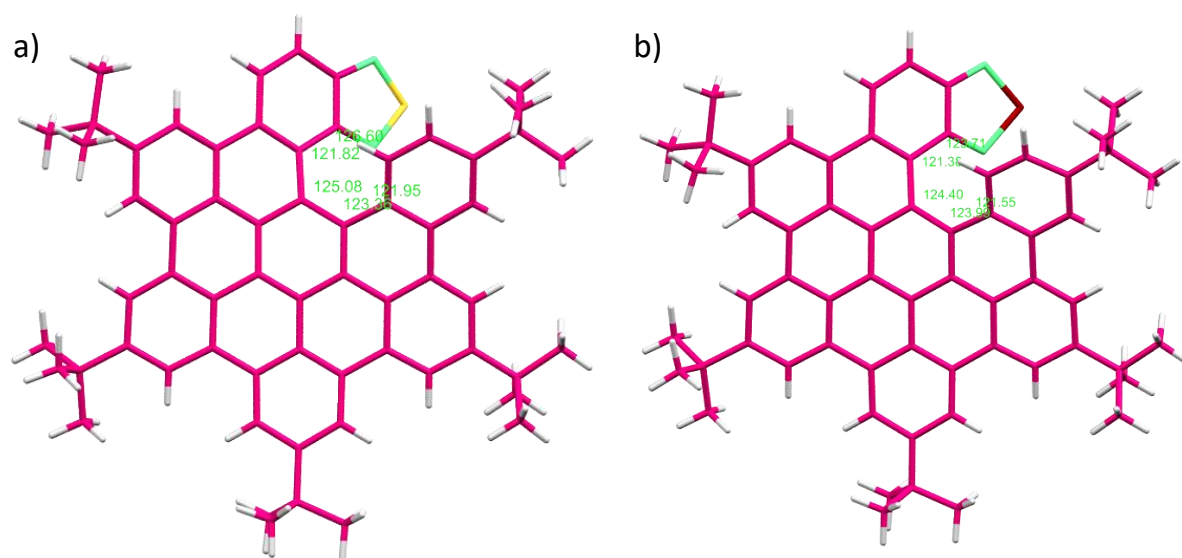

**Figure S1.** The inner torsion angles of a) SNG and b) SeNG.

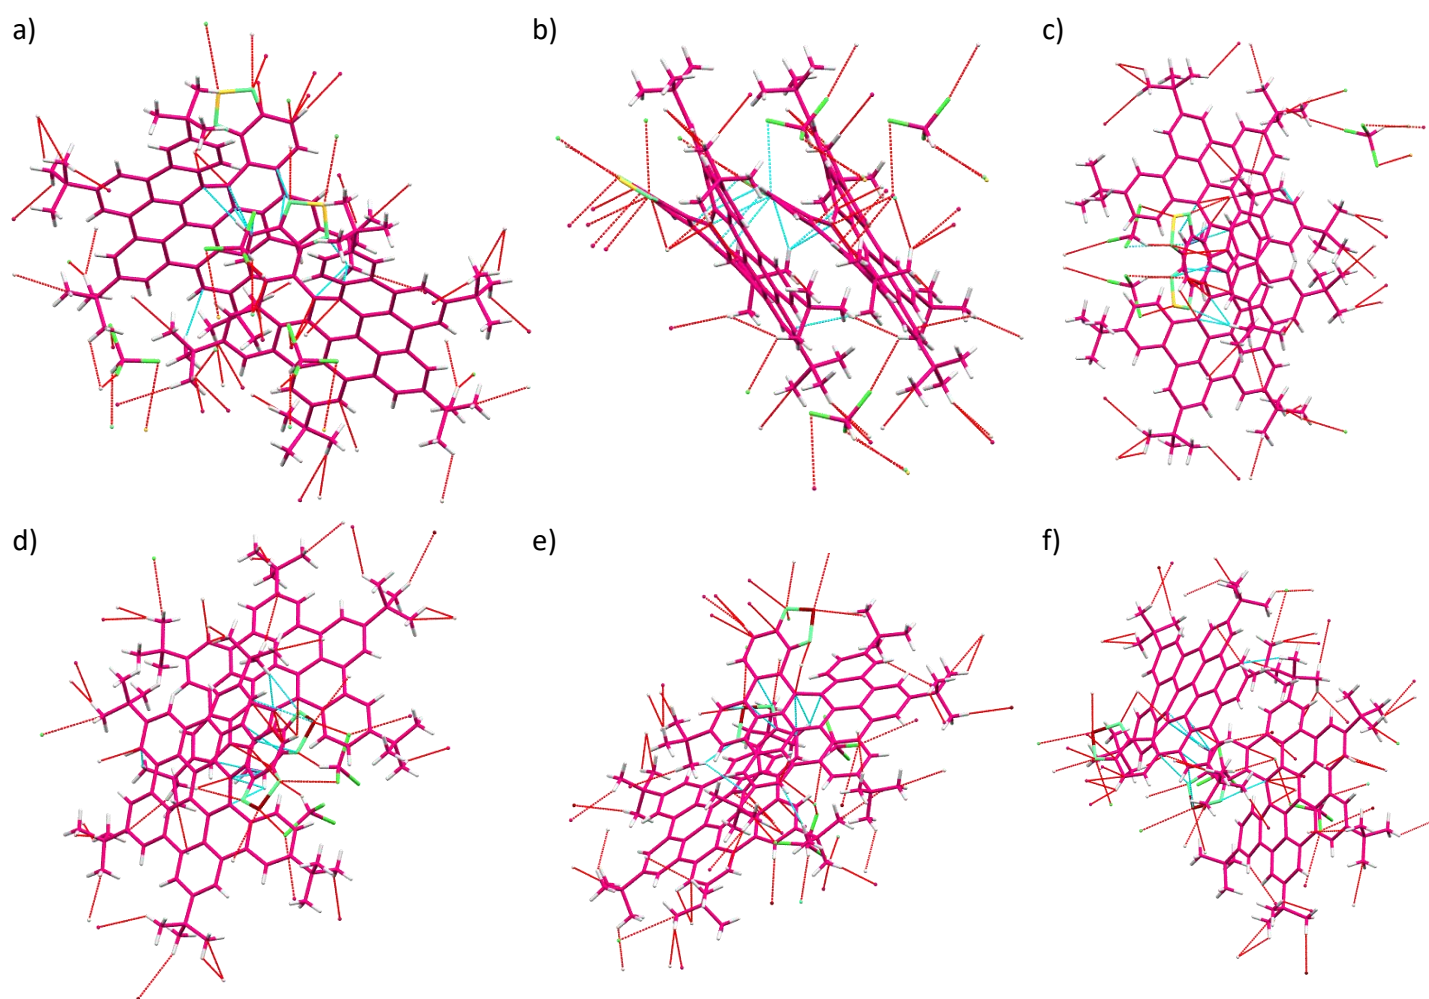

**Figure S2.** Extended molecular packing of a-c) SNG and d-f) SeNG along a, b, and c axes, respectively.

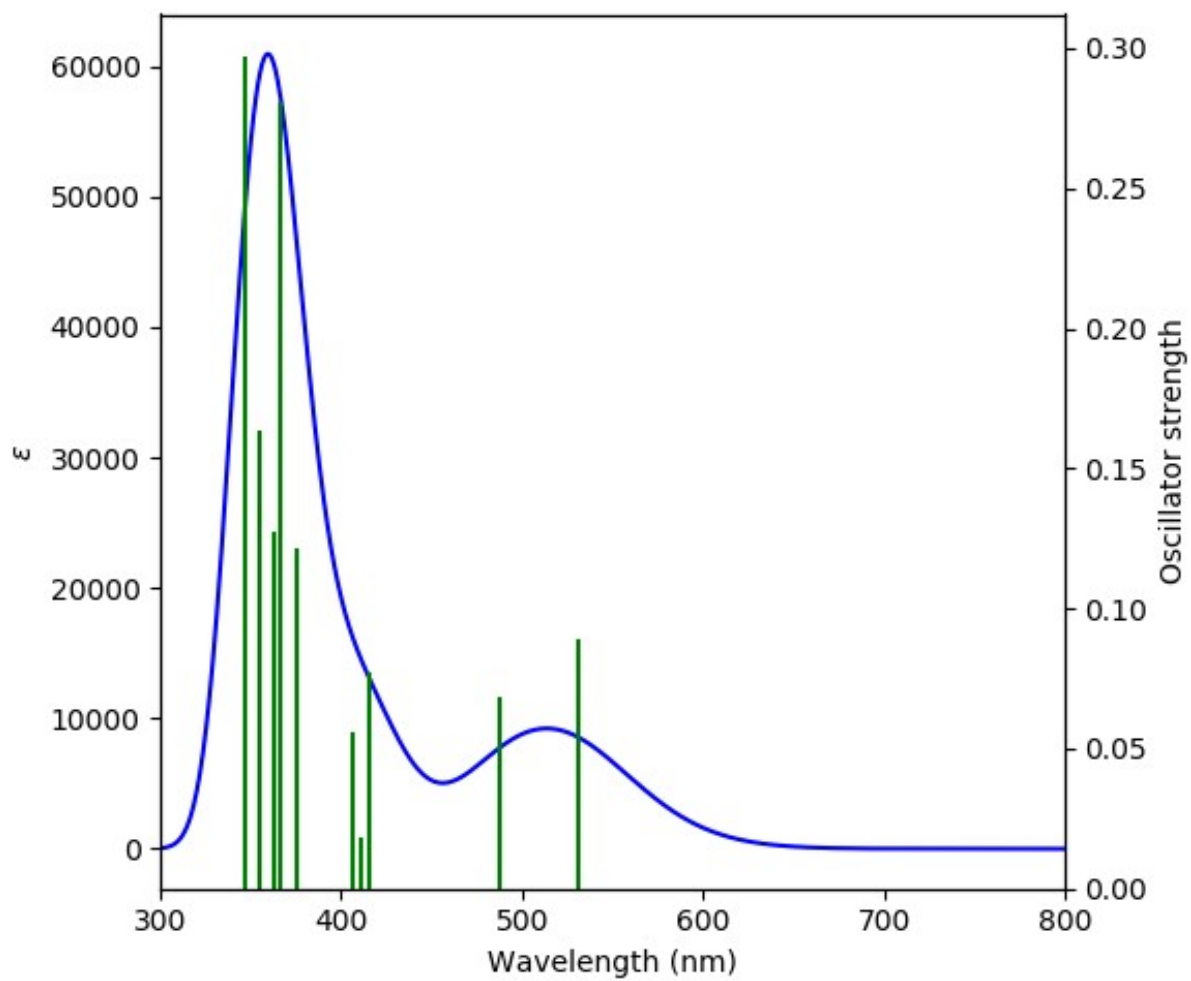

**Figure S3.** Simulated absorption spectrum (blue line) of SNG and calculated oscillator strength (Green bar) of SNG at the B3LYP/6-311G (d, p) level.

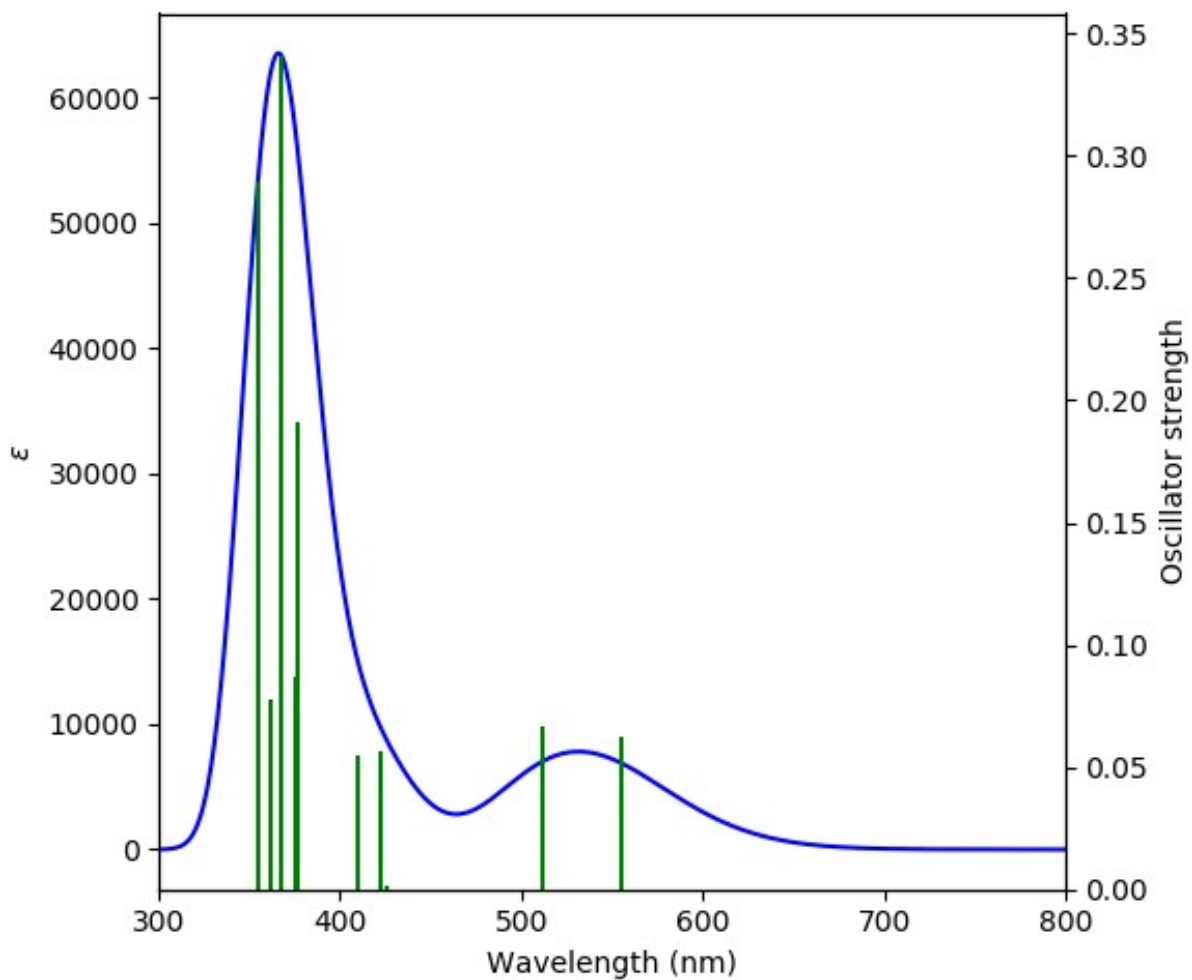

**Figure S4.** Simulated absorption spectrum (blue line) of **SeNG** and calculated oscillator strength (Green bar) of **SNG** at the B3LYP/6-311G (d, p) level.

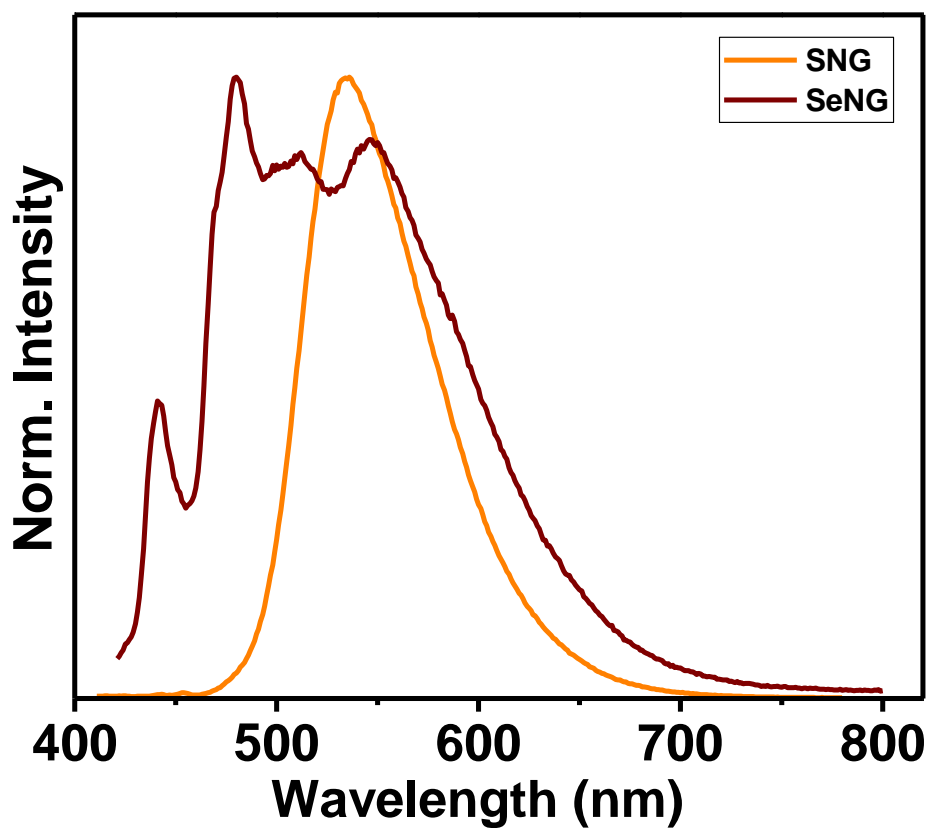

Figure S5. Normalized fluorescence spectra of SNG and SeNG in  $\text{CH}_2\text{Cl}_2$ .

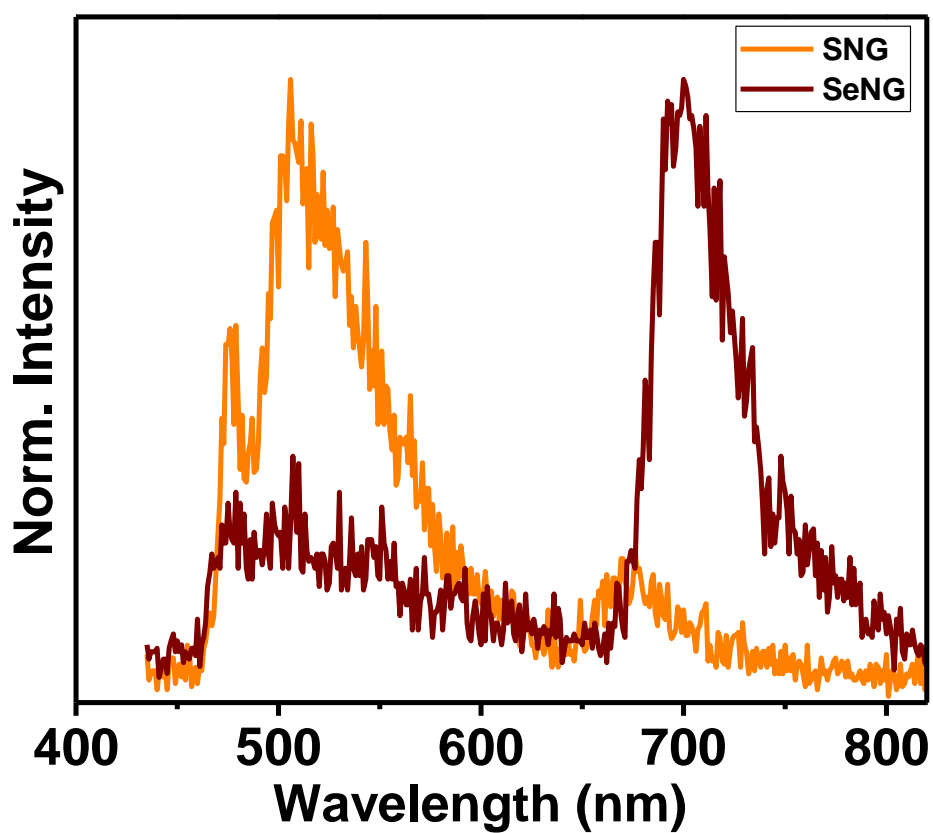

Figure S6. Normalized phosphorescence spectra of SNG and SeNG in MTHF.

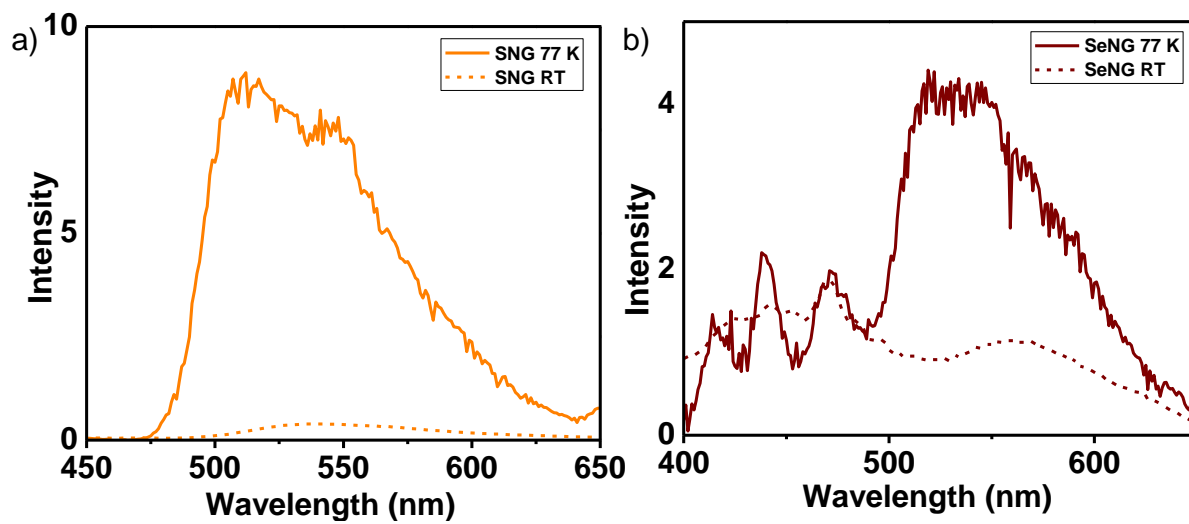

**Figure S7.** Fluorescence spectra of SNG and SeNG in MTHF at RT and 77K.

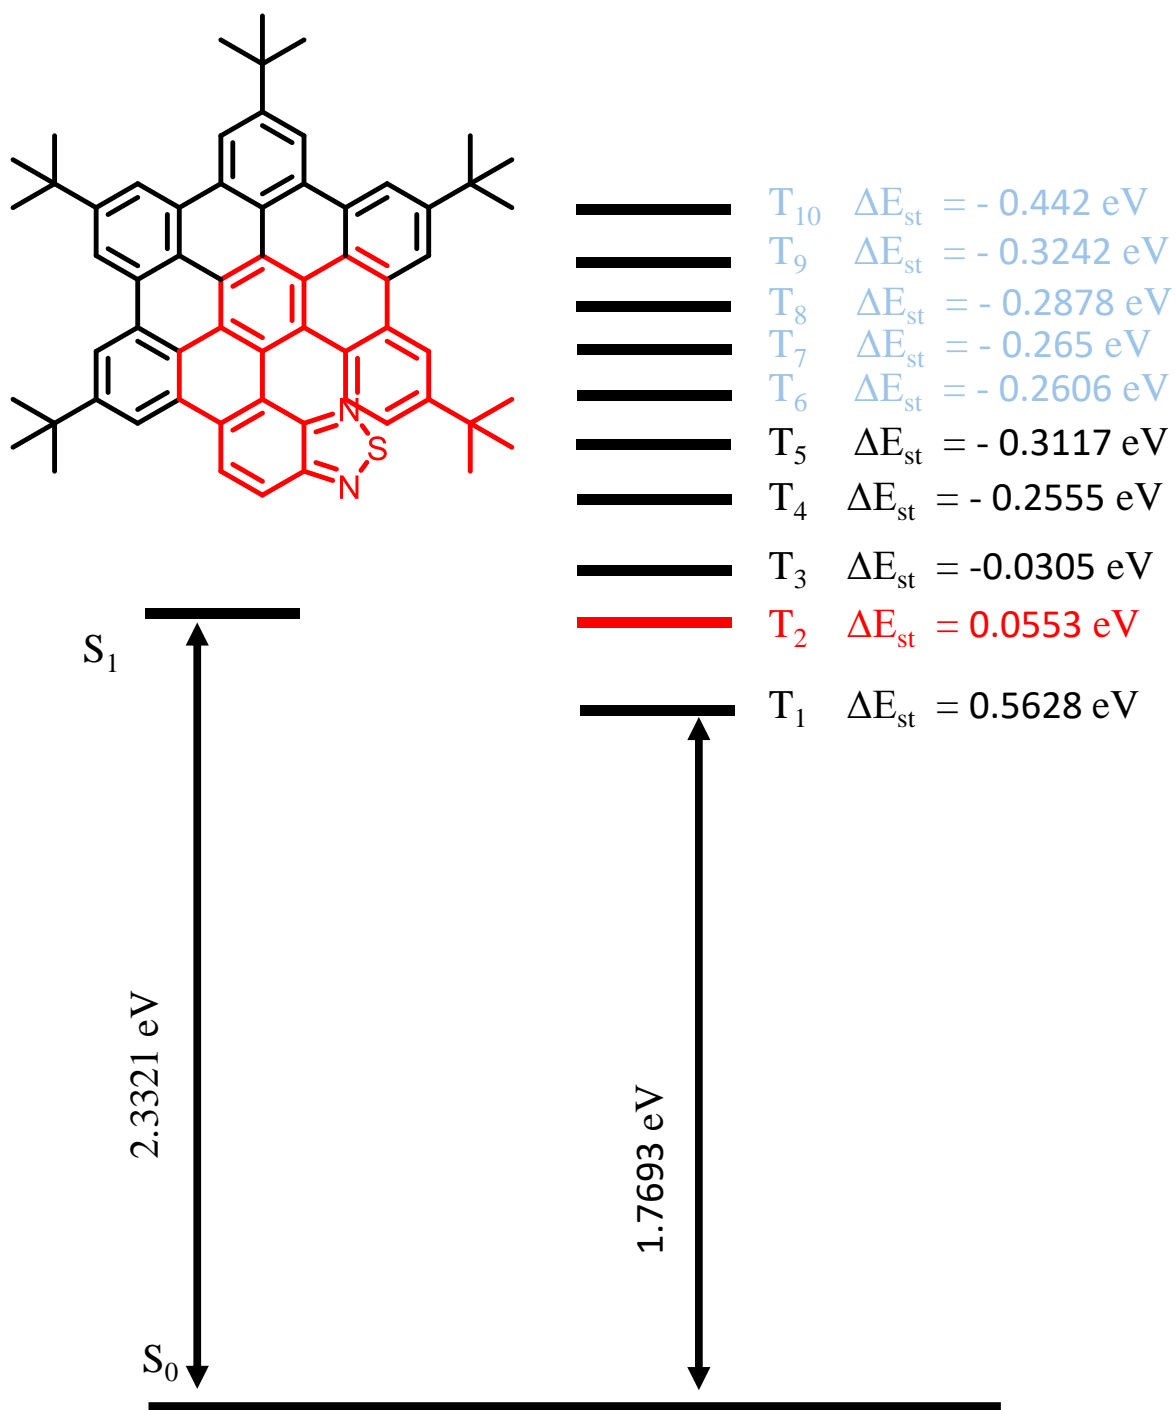

**Figure S8.** Calculated energy level diagram of SNG.

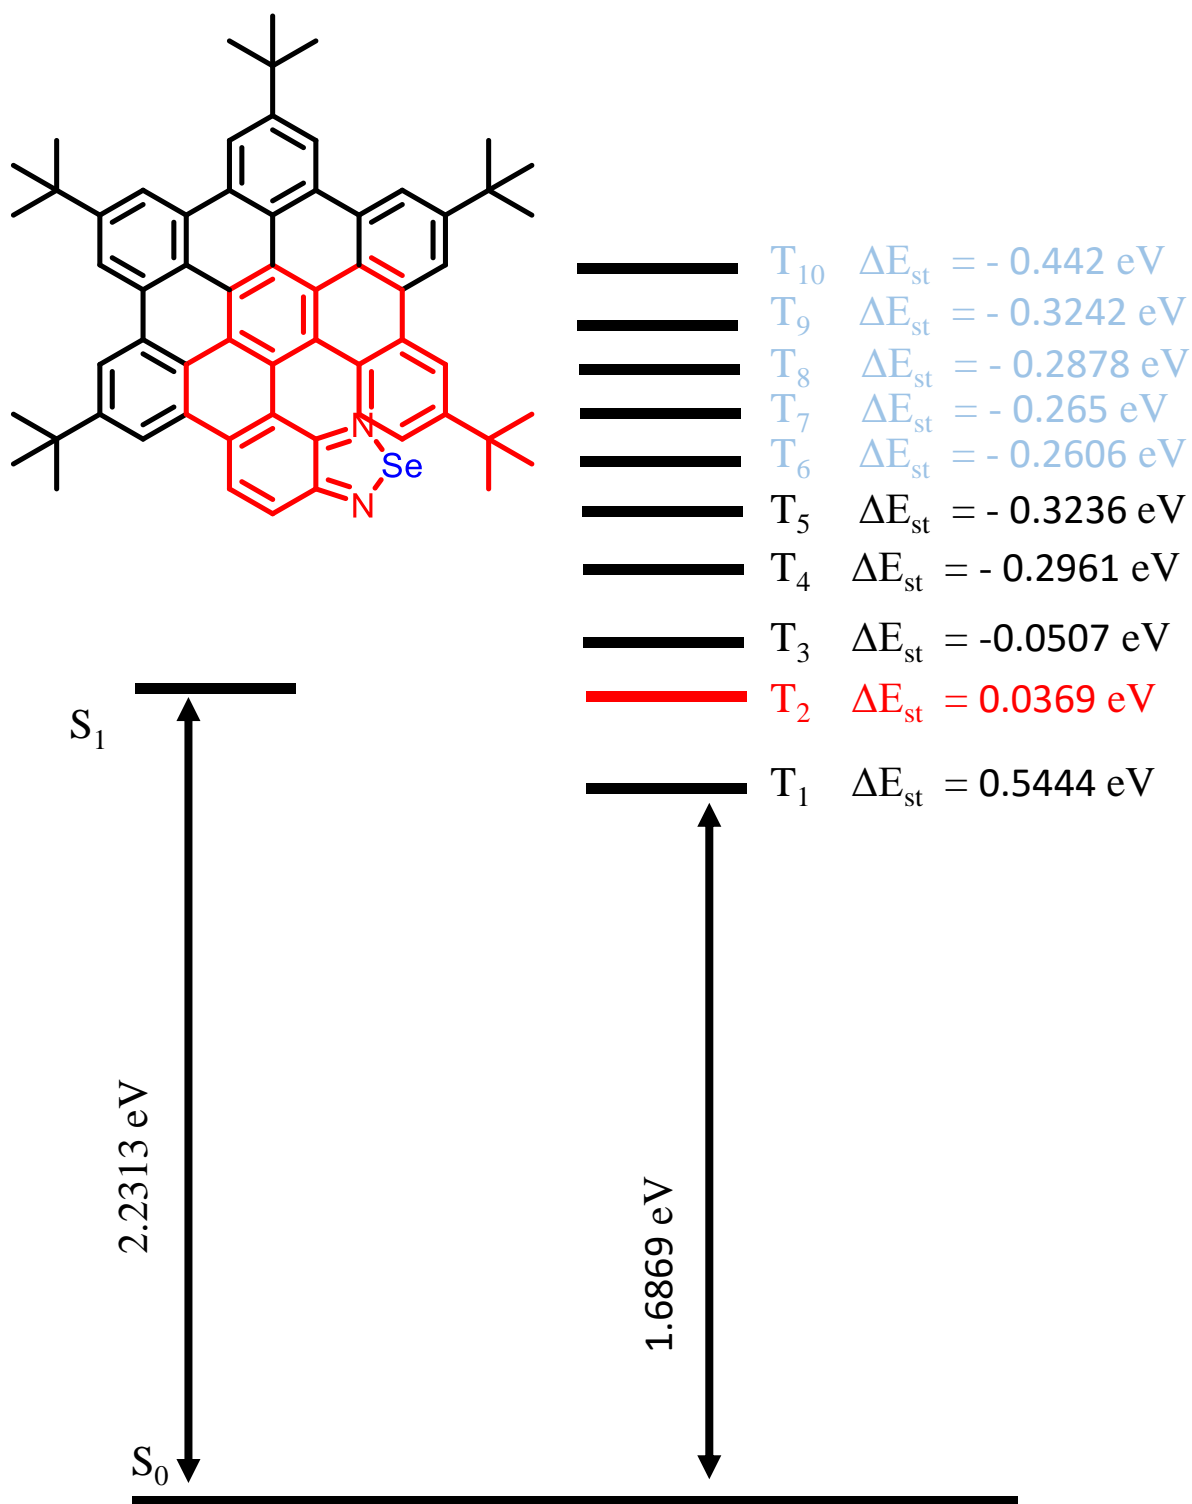

**Figure S9.** Calculated energy level diagram of SeNG.



Date Acquired : 7/20/2023 10:52:11 AM  
Date Processed : 7/21/2023 3:54:41 PM

Acquired by : System Administrator  
Processed by : System Administrator

### <Chromatogram>

mAU

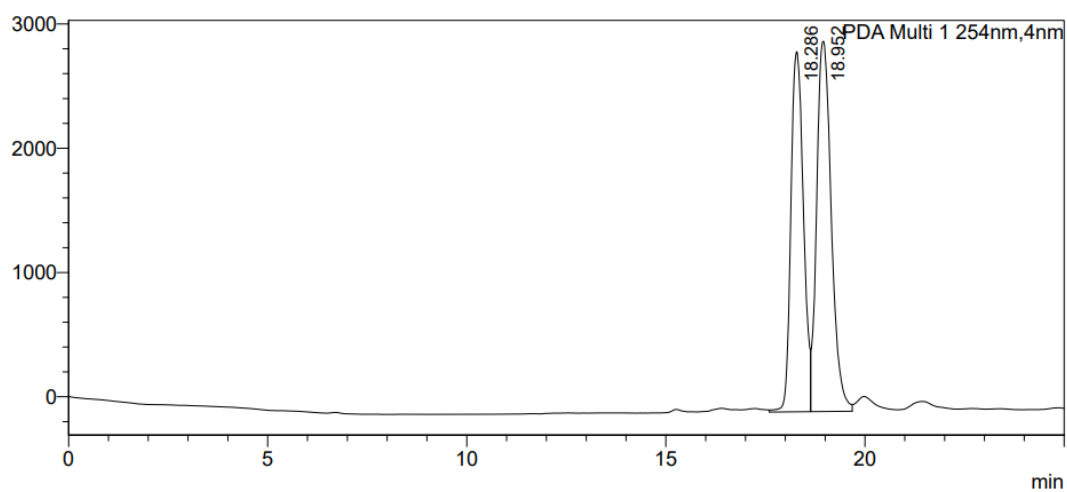

### <Peak Table>

PDA Ch1 254nm

| Peak# | Ret. Time | Area      | Height  | Area%   |
|-------|-----------|-----------|---------|---------|
| 1     | 18.286    | 63598002  | 2898099 | 45.512  |
| 2     | 18.952    | 76141598  | 2980369 | 54.488  |
| Total |           | 139739600 | 5878467 | 100.000 |

Column: CHIRALPAK SA  
Eluent System: 90 : 10 (HEXANE:IPA)  
Flow rate: 1 ml/min Injection  
vol.: 10 ul  
Wavelength: 254 nm  
Sample Conc.: 1.0mg/ml

**Figure S10.** HPLC profile of SNG in *n*-hexane:isopropanol (90:10) by monitoring at 254 nm.

Date Acquired : 7/20/2023 12:24:56 PM  
Date Processed : 7/21/2023 4:03:35 PM

Acquired by : System Administrator  
Processed by : System Administrator

### <Chromatogram>

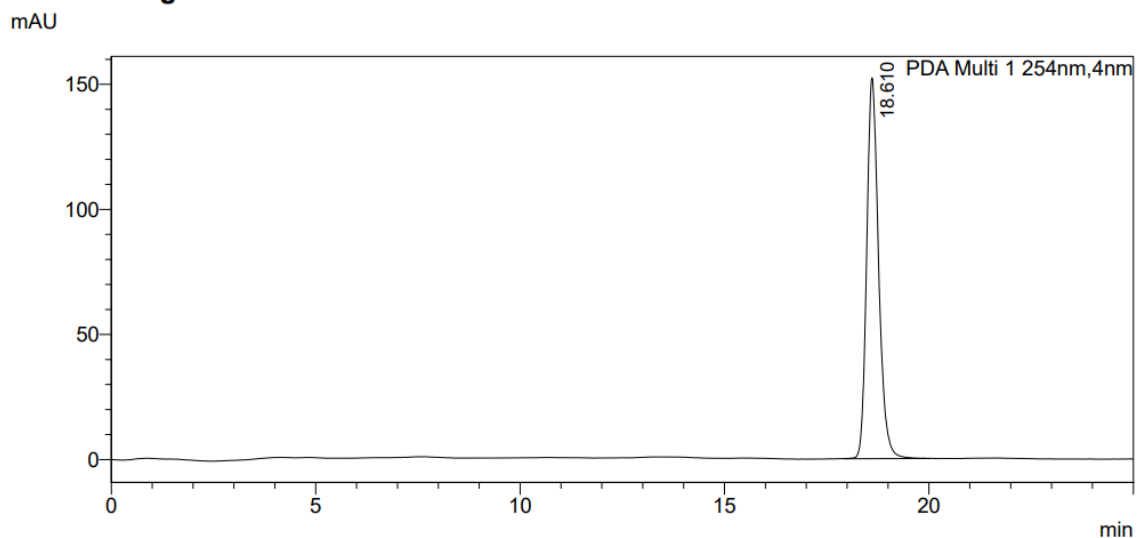

### <Peak Table>

PDA Ch1 254nm

| Peak# | Ret. Time | Area    | Height | Area%   |
|-------|-----------|---------|--------|---------|
| 1     | 18.610    | 3081126 | 152269 | 100.000 |
| Total |           | 3081126 | 152269 | 100.000 |

Column: CHIRALPAK SA  
Eluent System: 90 : 10 (HEXANE:IPA)  
Flow rate: 1 ml/min Injection  
vol.: 10 ul  
Wavelength: 254 nm  
Sample Conc.: 1.0mg/ml

**Figure S11.** HPLC trace for (*M*)-SNG.

Date Acquired : 7/20/2023 12:50:18 PM  
Date Processed : 7/21/2023 4:05:07 PM

Acquired by : System Administrator  
Processed by : System Administrator

### <Chromatogram>

mAU

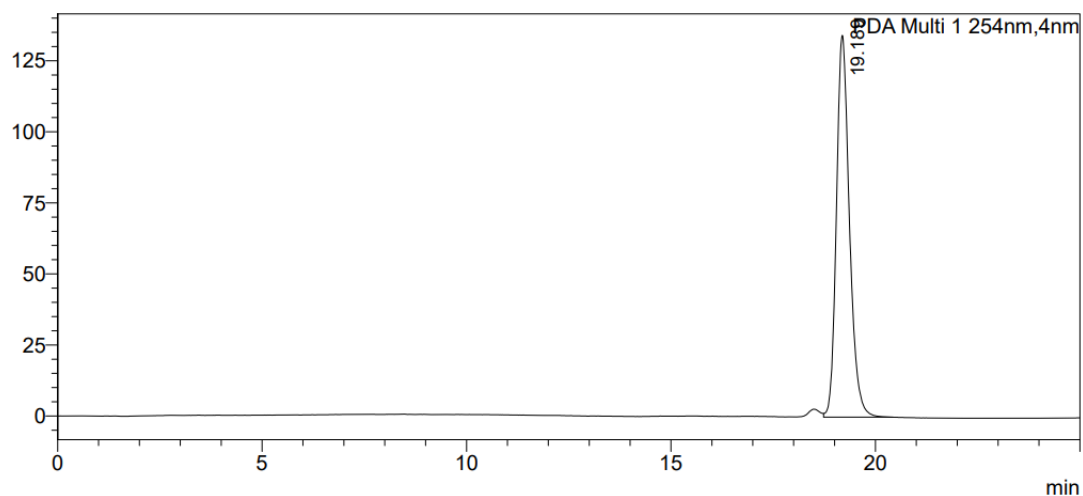

### <Peak Table>

PDA Ch1 254nm

| Peak# | Ret. Time | Area    | Height | Area%   |
|-------|-----------|---------|--------|---------|
| 1     | 19.189    | 2975712 | 134369 | 100.000 |
| Total |           | 2975712 | 134369 | 100.000 |

Column: CHIRALPAK SA  
Eluent System: 90 : 10 (HEXANE:IPA)  
Flow rate: 1 ml/min Injection  
vol.: 10 ul  
Wavelength: 254 nm  
Sample Conc.: 1.0mg/ml

**Figure S12.** HPLC trace for (*P*)-SNG

Date Acquired : 7/20/2023 11:18:36 AM  
Date Processed : 7/21/2023 4:01:33 PM

Acquired by : System Administrator  
Processed by : System Administrator

### <Chromatogram>

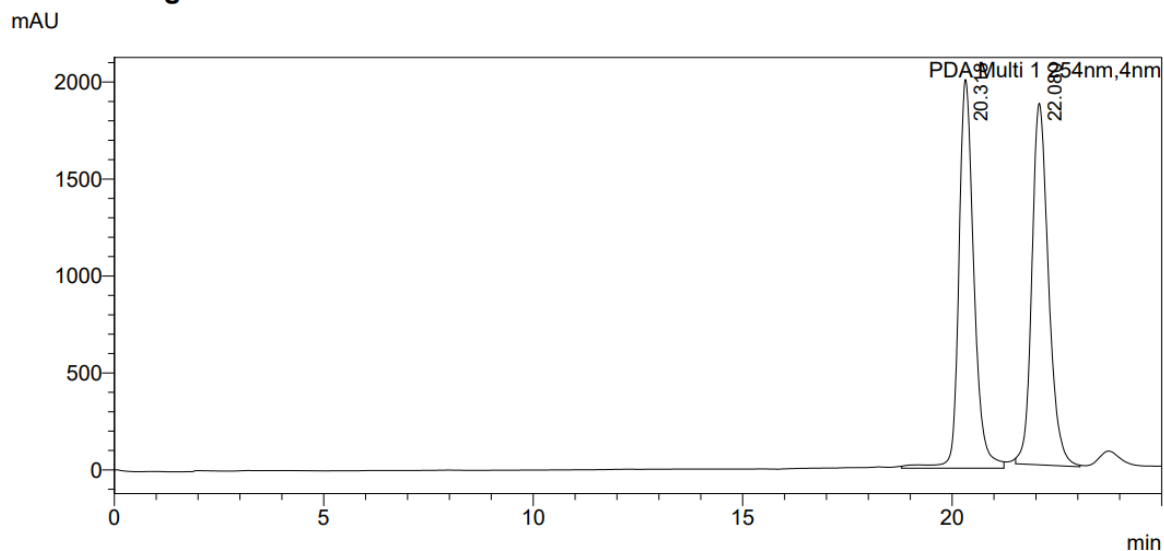

### <Peak Table>

PDA Ch1 254nm

| Peak# | Ret. Time | Area      | Height  | Area%   |
|-------|-----------|-----------|---------|---------|
| 1     | 20.318    | 50200051  | 2004798 | 49.444  |
| 2     | 22.080    | 51328594  | 1864855 | 50.556  |
| Total |           | 101528646 | 3869652 | 100.000 |

Column: CHIRALPAK SA  
Eluent System: 90 : 10 (HEXANE:IPA)  
Flow rate: 1 ml/min Injection  
vol.: 10 ul  
Wavelength: 254 nm  
Sample Conc.: 1.0mg/ml

**Figure S13.** HPLC profile of **SeNG** in *n*-hexane:isopropanol (90:10) by monitoring at 254 nm.

Date Acquired : 7/20/2023 1:15:41 PM  
Date Processed : 7/21/2023 4:07:57 PM

Acquired by : System Administrator  
Processed by : System Administrator

### <Chromatogram>

mAU

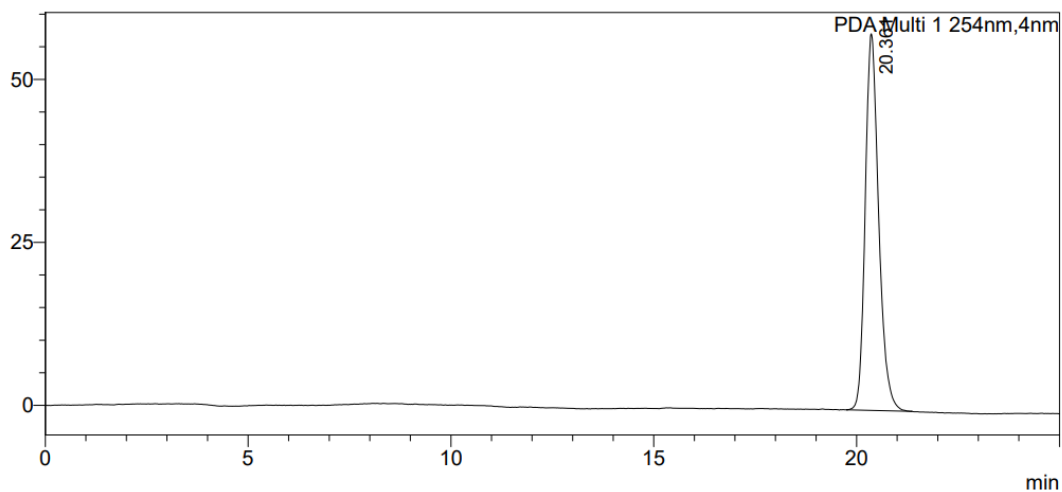

### <Peak Table>

PDA Ch1 254nm

| Peak# | Ret. Time | Area    | Height | Area%   |
|-------|-----------|---------|--------|---------|
| 1     | 20.361    | 1333804 | 57785  | 100.000 |
| Total |           | 1333804 | 57785  | 100.000 |

Column: CHIRALPAK SA  
Eluent System: 90 : 10 (HEXANE:IPA)  
Flow rate: 1 ml/min Injection  
vol.: 10 ul  
Wavelength: 254 nm  
Sample Conc.: 1.0mg/ml

**Figure S14.** HPLC trace for (*M*)-SeNG

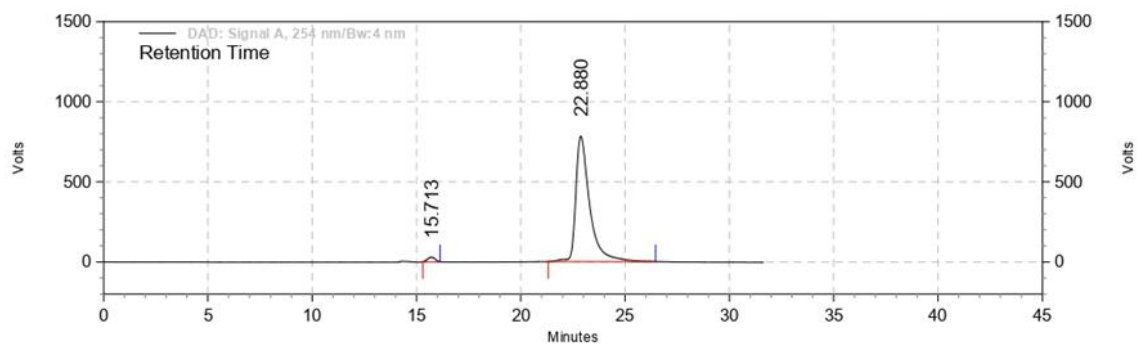

**DAD: Signal A, 254 nm/Bw:4 nm  
Results**

| Retention Time | Area     | Area % |
|----------------|----------|--------|
| 15.713         | 1484493  | 1.91   |
| 22.880         | 76254499 | 98.09  |
| Totals         | 77738992 | 100.00 |

Column: CHIRALPAK SA  
 Eluent System: 90 : 10 (HEXANE:IPA)  
 Flow rate: 1 ml/min Injection  
 vol.: 10 ul  
 Wavelength: 254 nm  
 Sample Conc.: 1.0mg/ml

**Figure S15.** HPLC trace for (*P*)-SeNG

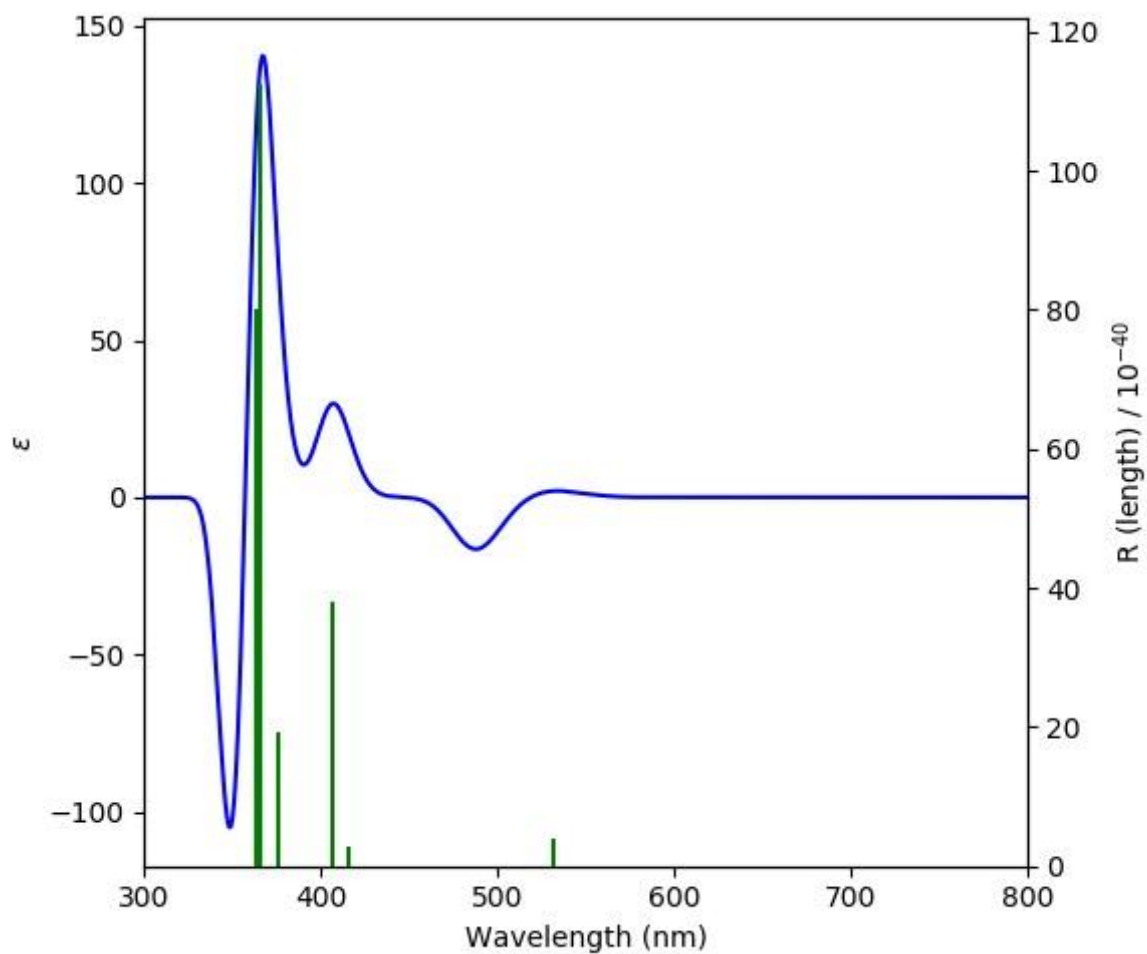

**Figure S16.** Simulated CD spectra and calculated rotatory strength (Green verticle bar) for assigning absolute configuration of isomer (*P*)-SNG at the B3LYP/6-311G (d, p) level.

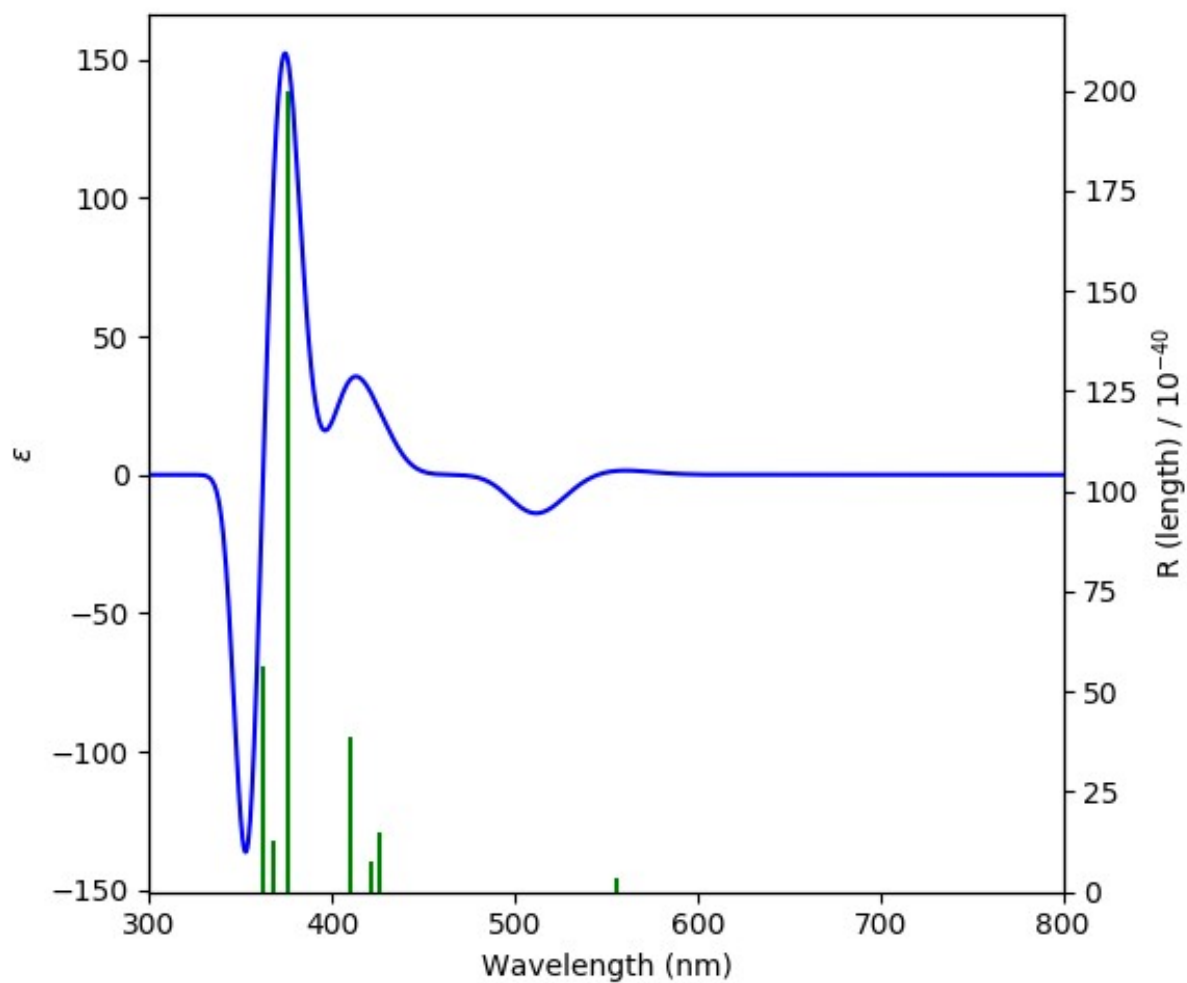

**Figure S17.** Simulated CD spectra and calculated rotatory strength (Green verticle bar) for assigning absolute configuration of isomer (*P*)-SeNG at the B3LYP/6-311G (d, p) level.



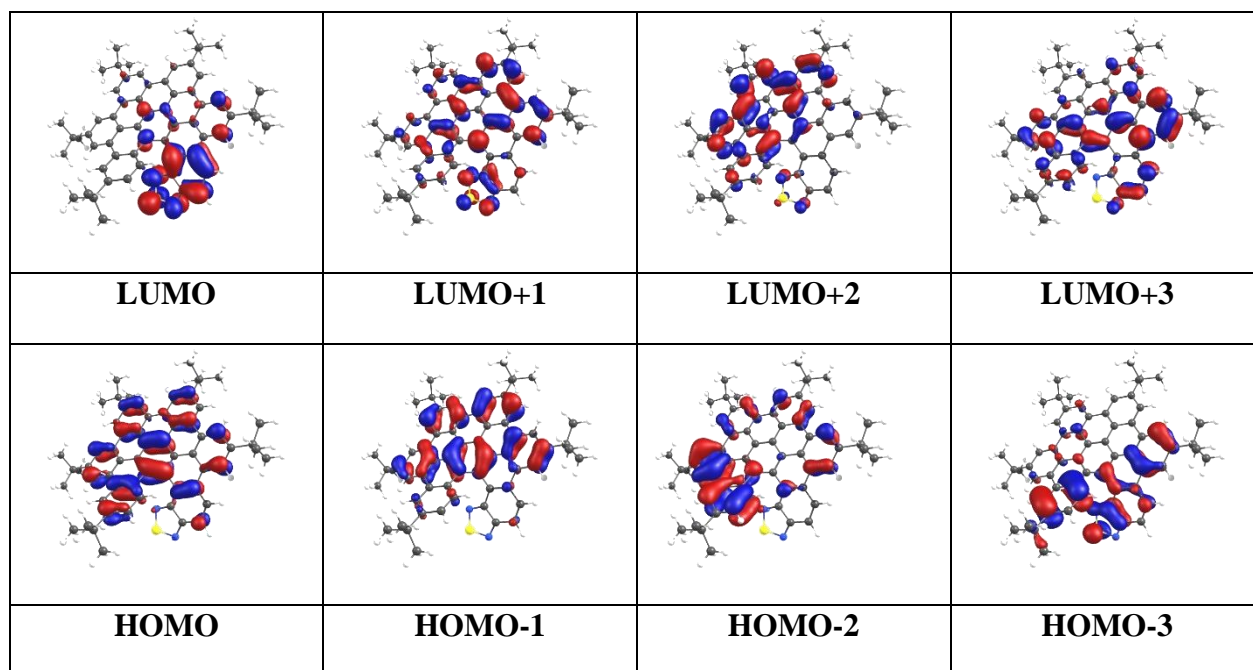

**Figure S18.** Involved frontier orbitals of SNG.

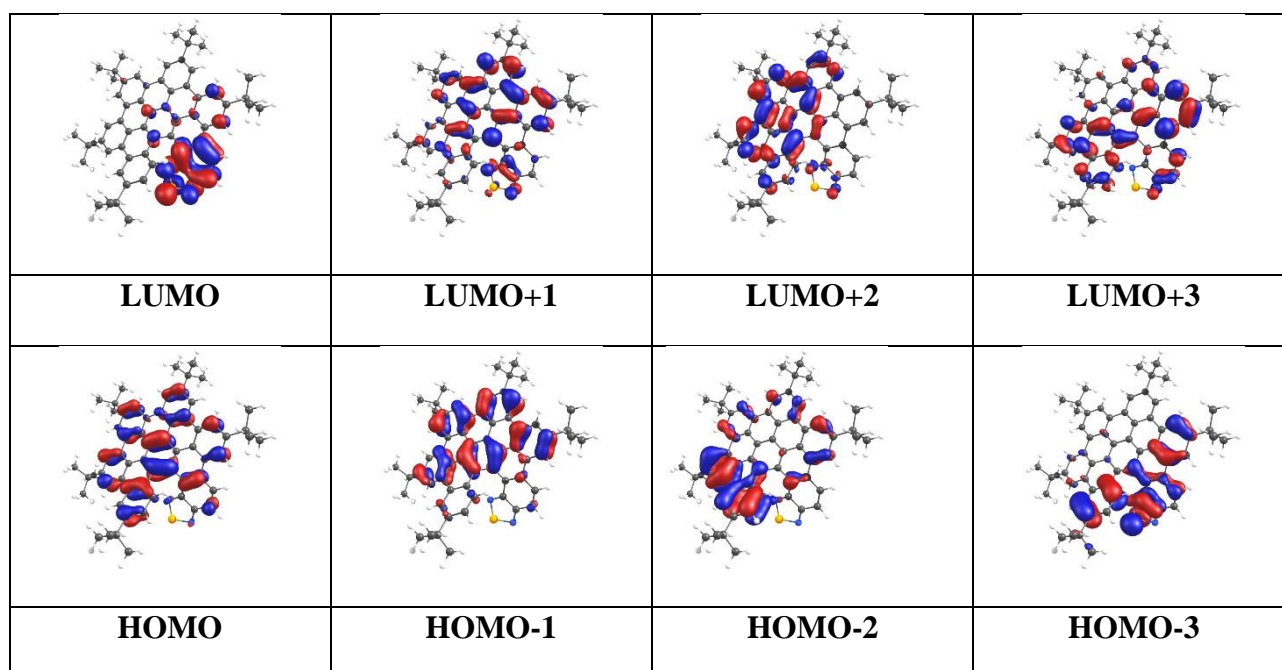

**Figure S19.** Involved frontier orbitals of SeNG.

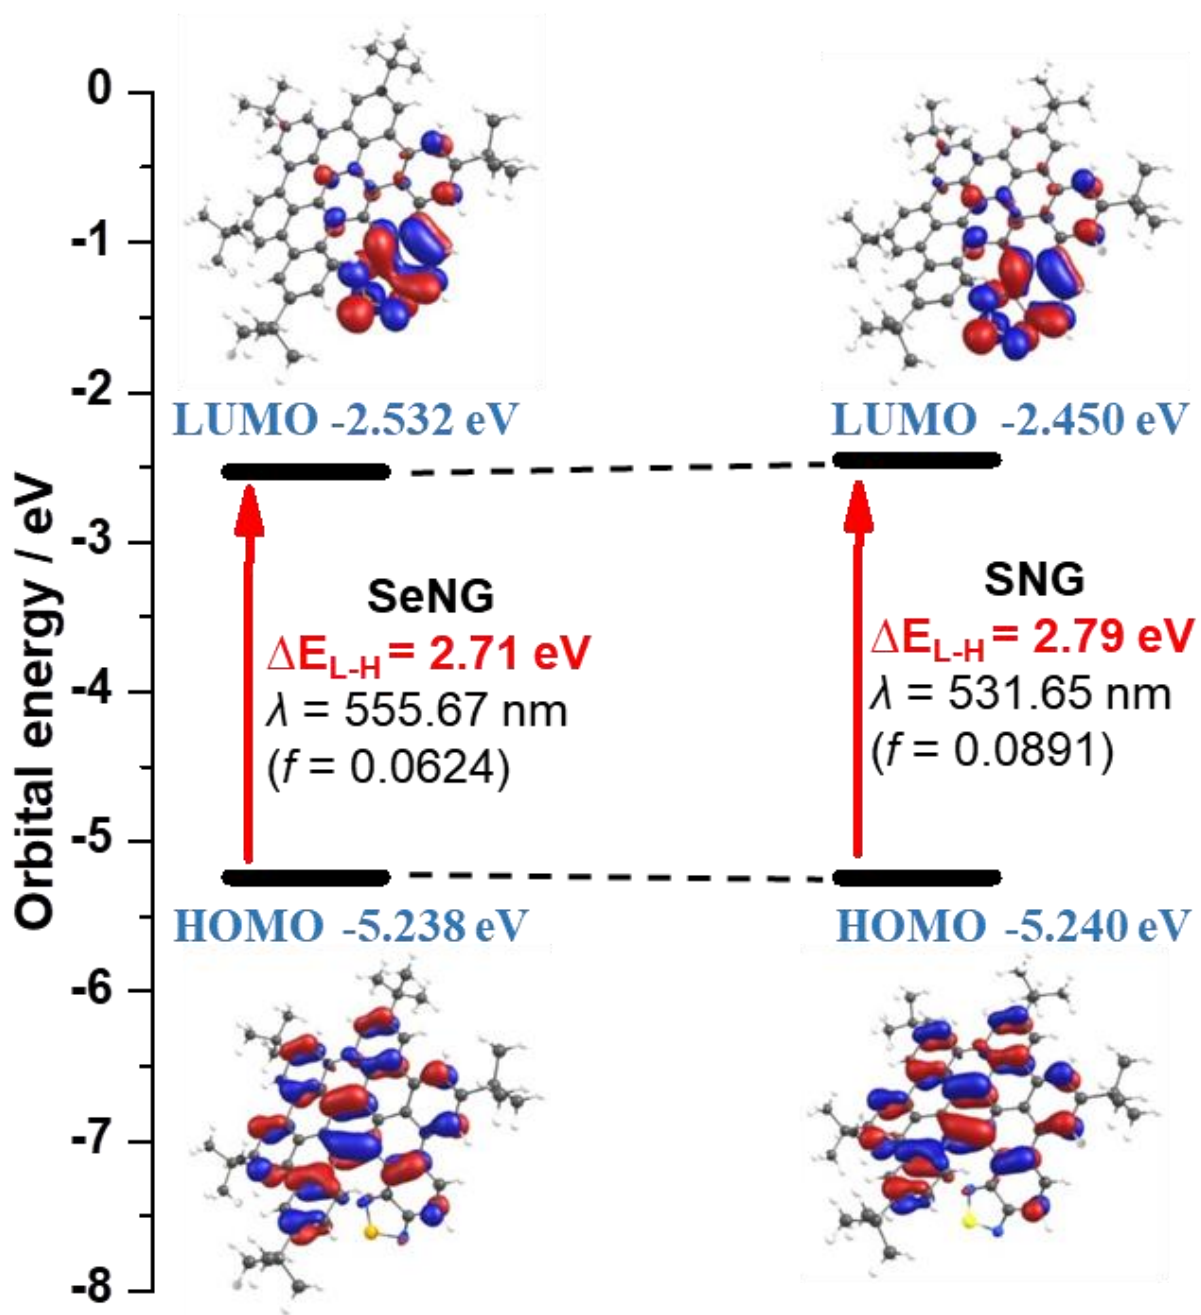

Figure S20. HOMO-LUMO energy gap of SNG and SeNG obtained by DFT calculation.

## Tables

**Table S1. Excitation properties of SNG calculated at the TD-B3LYP/6-311G(d,p) level**

|                 | $\Delta E$ (eV) | $\lambda$ (nm) | $f$    | Configuration(orbital symmetry) | Coefficient |
|-----------------|-----------------|----------------|--------|---------------------------------|-------------|
| <b>S0 _ S1</b>  | 2.3321          | 531.65         | 0.0891 | HOMO (230) _ LUMO (231)         | 0.69583     |
| <b>S0 _ S2</b>  | 2.5410          | 487.94         | 0.0682 | HOMO-1 (229) _ LUMO (231)       | 0.67663     |
| <b>S0 _ S3</b>  | 2.9827          | 415.68         | 0.0775 | HOMO (230) _ LUMO+1 (232)       | 0.50822     |
| <b>S0 _ S4</b>  | 3.0137          | 411.41         | 0.0183 | HOMO -2(228) _ LUMO (231)       | 0.64198     |
| <b>S0 _ S5</b>  | 3.0477          | 406.81         | 0.0560 | HOMO (230) _ LUMO+2(233)        | 0.50825     |
| <b>S0 _ S6</b>  | 3.2985          | 375.88         | 0.1212 | HOMO (230) _ LUMO+3 (234)       | 0.43038     |
| <b>S0 _ S7</b>  | 3.3859          | 366.17         | 0.2805 | HOMO-3 (227) _ LUMO (231)       | 0.38486     |
| <b>S0 _ S8</b>  | 3.4135          | 363.22         | 0.1275 | HOMO-3(227) _ LUMO (231)        | 0.39493     |
| <b>S0 _ S9</b>  | 3.4947          | 354.78         | 0.1635 | HOMO-4(226) _ LUMO (231)        | 0.36789     |
| <b>S0 _ S10</b> | 3.5712          | 347.18         | 0.2973 | HOMO-4(226) _ LUMO (231)        | 0.45816     |

|                | $\Delta E$ (eV) | $\lambda$ (nm) | $f$    | Configuration (orbital symmetry) | Coefficient |
|----------------|-----------------|----------------|--------|----------------------------------|-------------|
| <b>S0 _ T1</b> | 1.7693          | 700.74         | 0.0000 | HOMO (230) _ LUMO (231)          | 0.60259     |
| <b>S0 _ T2</b> | 2.2768          | 544.55         | 0.0000 | HOMO-1 (229) _ LUMO (231)        | 0.48939     |
| <b>S0 _ T3</b> | 2.3626          | 524.77         | 0.0000 | HOMO-1 (229) _ LUMO              | 0.41450     |

|               |        |        |        |                                |         |
|---------------|--------|--------|--------|--------------------------------|---------|
|               |        |        |        | (231)                          |         |
| <b>S0_T4</b>  | 2.5876 | 479.16 | 0.0000 | HOMO (230) _ LUMO+2<br>(233)   | 0.36868 |
| <b>S0_T5</b>  | 2.6438 | 468.97 | 0.0000 | HOMO (230) _ LUMO+1<br>(232)   | 0.35992 |
| <b>S0_T6</b>  | 2.7611 | 449.03 | 0.0000 | HOMO (230) _ LUMO+1<br>(232)   | 0.37138 |
| <b>S0_T7</b>  | 2.8302 | 438.08 | 0.0000 | HOMO (230) _ LUMO+2<br>(233)   | 0.35785 |
| <b>S0_T8</b>  | 2.9245 | 423.94 | 0.0000 | HOMO-3 (227) _ LUMO<br>(231)   | 0.34216 |
| <b>S0_T9</b>  | 2.9580 | 419.15 | 0.0000 | HOMO-1 (229) _<br>LUMO+1 (232) | 0.42118 |
| <b>S0_T10</b> | 3.0988 | 400.10 | 0.0000 | HOMO-2 (228) _ LUMO<br>(231)   | 0.39639 |

**Table S2. Excitation properties of SeNG calculated at the TD-B3LYP/6-311G(d,p) level**

|                 | $\Delta E$ (eV) | $\lambda$ (nm) | $f$    | Configuration (orbital symmetry) | Coefficient |
|-----------------|-----------------|----------------|--------|----------------------------------|-------------|
| <b>S0 _ S1</b>  | 2.2313          | 555.67         | 0.0624 | HOMO (239) _ LUMO (240)          | 0.69809     |
| <b>S0 _ S2</b>  | 2.4222          | 511.87         | 0.0669 | HOMO-1 (238) _ LUMO (240)        | 0.68947     |
| <b>S0 _ S3</b>  | 2.9111          | 425.90         | 0.0013 | HOMO-2 (237) _ LUMO (240)        | 0.68367     |
| <b>S0 _ S4</b>  | 2.9393          | 421.81         | 0.0563 | HOMO (239) _ LUMO+1 (241)        | 0.51130     |
| <b>S0 _ S5</b>  | 3.0258          | 409.75         | 0.0548 | HOMO (239) _ LUMO +2(242)        | 0.52925     |
| <b>S0 _ S6</b>  | 3.2885          | 377.03         | 0.1913 | HOMO (239) _ LUMO+3 (243)        | 0.38899     |
| <b>S0 _ S7</b>  | 3.3034          | 375.32         | 0.0866 | HOMO-3 (236) _ LUMO (240)        | 0.56435     |
| <b>S0 _ S8</b>  | 3.3739          | 367.48         | 0.3412 | HOMO -1(238) _ LUMO +2(242)      | 0.47316     |
| <b>S0 _ S9</b>  | 3.4286          | 361.62         | 0.0777 | HOMO-4 (235) _ LUMO (240)        | 0.57907     |
| <b>S0 _ S10</b> | 3.5002          | 354.22         | 0.2895 | HOMO (239) _ LUMO+3 (243)        | 0.35022     |

|                | $\Delta E$ (eV) | $\lambda$ (nm) | $f$    | Configuration (orbital symmetry) | Coefficient |
|----------------|-----------------|----------------|--------|----------------------------------|-------------|
| <b>S0 _ T1</b> | 1.6869          | 735.00         | 0.0000 | HOMO (239) _ LUMO (240)          | 0.58927     |
| <b>S0 _ T2</b> | 2.1944          | 565.00         | 0.0000 | HOMO-1(238) _ LUMO (240)         | 0.51885     |
| <b>S0 _ T3</b> | 2.2820          | 543.30         | 0.0000 | HOMO-1 (238) _ LUMO (240)        | 0.36959     |

|                 |        |        |        |                             |         |
|-----------------|--------|--------|--------|-----------------------------|---------|
| <b>S0 _ T4</b>  | 2.5274 | 490.56 | 0.0000 | HOMO-2 (237) _ LUMO (240)   | 0.41058 |
| <b>S0 _ T5</b>  | 2.5549 | 485.29 | 0.0000 | HOMO-4 (235) _ LUMO (240)   | 0.33923 |
| <b>S0 _ T6</b>  | 2.6838 | 461.98 | 0.0000 | HOMO (239) _ LUMO+1 (241)   | 0.48055 |
| <b>S0 _ T7</b>  | 2.7200 | 455.82 | 0.0000 | HOMO (239) _ LUMO (240)     | 33920   |
| <b>S0 _ T8</b>  | 2.8614 | 433.29 | 0.0000 | HOMO (239) _ LUMO (240)     | 0.34093 |
| <b>S0 _ T9</b>  | 2.9101 | 426.05 | 0.0000 | HOMO-1 (238) _ LUMO+2 (242) | 0.42612 |
| <b>S0 _ T10</b> | 3.0312 | 409.02 | 0.0000 | HOMO-2 (237) _ LUMO (240)   | 0.37869 |

**Table S3.** Photophysical parameters of **SNG** and **SeNG**.

| <b>Sample</b> | $\lambda_{\max, \text{abs}}$ (nm) | $\lambda_{\max, \text{ems}}$ (nm) | $\phi_{\text{FI}}$ [%] | $t_{\text{FI}}$ [ns] | $K_{\text{nr, fl}}$ [ $10^9 \text{ s}^{-1}$ ] | $K_{\text{r, fl}}$ [ $10^9 \text{ s}^{-1}$ ] |
|---------------|-----------------------------------|-----------------------------------|------------------------|----------------------|-----------------------------------------------|----------------------------------------------|
| <b>SNG</b>    | 340                               | 560                               | 7.35                   | 16.05                | 0.0577                                        | 0.0045                                       |
| <b>SeNG</b>   | 349                               | 590                               | 0.9                    | 3.88                 | 0.255                                         | 0.0023                                       |

**Table S4.** Fluorescence lifetime of **SNG** and **SeNG**.

| <b>Sample</b>      | <b>Fluorescence lifetime (ns)</b>                  | <b>CHISQ.</b> |
|--------------------|----------------------------------------------------|---------------|
| <b>SNG@560 nm</b>  | 16.05 (47.79 %)<br>4.98 (49.01 %)<br>0.50 (3.20 %) | 1.14          |
| <b>SeNG@590 nm</b> | 1.37 (91.47 %)<br>3.88 (8.53 %)                    | 1.09          |

**Table S5.** Phosphorescence lifetime of **SNG** and **SeNG** at 77 K.

| <b>Sample</b>      | <b>Phosphorescence lifetime (ms)</b> | <b>CHISQ.</b> |
|--------------------|--------------------------------------|---------------|
| <b>SNG@540 nm</b>  | 216 (79.18 %)<br>103 (20.82%)        | 1.01          |
| <b>SeNG@550 nm</b> | 2600 (90.46 %)<br>1200 (9.54 %)      | 1.07          |

## Details of DFT calculations

Ground ( $S_0$ ) state calculations were performed using restricted density functional theory (DFT). Singlet and triplet excited states were investigated using time-dependent density functional theory (TDDFT). The ground state singlet ( $S_0$ ) state was calculated using rB3LYP/6-311G(d,p) level of theory. Also the TD-DFT calculations were done with same level of theory. All the geometries of the complexes in the  $S_0$  state were optimized. The optimized Cartesian coordinates and total energies are listed below. On the basis of the Frank-Condon principle, the absorption properties were evaluated using the optimized  $S_0$  state structure. The Gaussian05 software was used in all the DFT and TD-DFT calculations.<sup>S2</sup>

## Optimized Cartesian coordinates of different complexes ( $S_0$ state) at the B3LYP/6-311G(d,p) level of theory.

### SNG

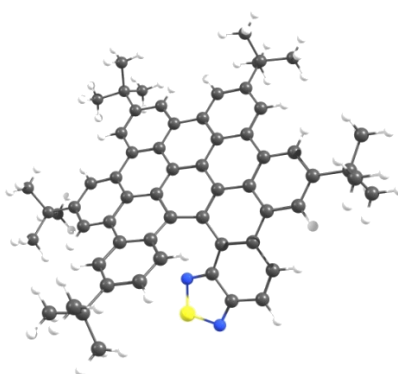

### Coordinates of Optimized Structure SNG

|   |              |              |              |   |              |              |              |
|---|--------------|--------------|--------------|---|--------------|--------------|--------------|
| C | -0.907100797 | -3.930872505 | 0.770591582  | C | 1.021472273  | 0.517363355  | -0.058122826 |
| C | -0.791959717 | -5.279983596 | 1.267068487  | C | -0.278055973 | 1.085655488  | 0.025105843  |
| C | 0.312586350  | -5.755500938 | 1.900754041  | C | -1.404899079 | 0.238763236  | 0.025510729  |
| C | 1.384461290  | -4.850197936 | 2.137397826  | C | -2.728974667 | 0.788265737  | -0.074924620 |
| C | 1.312967242  | -3.494756023 | 1.632247187  | C | -0.446406716 | 2.513633484  | 0.047106311  |
| C | 0.179537701  | -3.049746987 | 0.848700113  | C | 2.177479960  | 1.378842745  | -0.087678461 |
| N | 2.471320360  | -5.103655423 | 2.864387103  | C | 2.464503006  | -1.414775897 | -0.537207974 |
| S | 3.324110674  | -3.699050684 | 2.922892596  | C | 0.686002811  | 3.366630177  | 0.111942615  |
| N | 2.341335599  | -2.744741630 | 2.023696088  | C | 0.487717149  | 4.752415532  | 0.162534339  |
| C | 0.079540941  | -1.702970975 | 0.306145206  | C | -0.781000330 | 5.327331561  | 0.160662972  |
| C | -1.224438614 | -1.161049942 | 0.177294210  | C | -1.880457273 | 4.470120648  | 0.087571167  |
| C | -2.361778664 | -2.037496925 | 0.130520692  | C | -1.751004257 | 3.080336115  | 0.019210827  |
| C | -3.654069252 | -1.521662933 | -0.143554189 | C | -2.918318351 | 2.197284879  | -0.089440349 |
| C | -4.698356790 | -2.421138799 | -0.399383472 | C | -4.218525124 | 2.697197652  | -0.203413046 |
| C | -4.526256199 | -3.804101263 | -0.359867390 | C | -5.342051155 | 1.871511818  | -0.282401173 |
| C | -3.267010168 | -4.290217306 | -0.002462724 | C | -5.134565386 | 0.494739414  | -0.256344063 |
| C | -2.186338197 | -3.443663520 | 0.266114953  | C | -3.855463535 | -0.069965238 | -0.165978736 |
| C | -5.662154865 | -4.792798334 | -0.684645408 | C | 3.476974948  | 0.827613622  | -0.220326981 |
| C | -6.973012796 | -4.078780716 | -1.061171007 | C | 4.592555578  | 1.657039486  | -0.047453609 |
| C | -5.242235975 | -5.682438970 | -1.878020899 | C | 4.471300888  | 3.019959023  | 0.212090214  |
| C | -5.939779295 | -5.685082157 | 0.547701125  | C | 3.182293992  | 3.558082363  | 0.256566876  |
| C | 1.191265900  | -0.886662225 | -0.055592145 | C | 2.031567652  | 2.780075790  | 0.096668509  |



|   |              |              |              |   |              |              |              |
|---|--------------|--------------|--------------|---|--------------|--------------|--------------|
| C | 2.577742376  | -2.713120172 | -1.075710210 | H | 1.700852282  | -3.344436420 | -1.125874070 |
| C | 3.770977852  | -3.194379956 | -1.567765596 | H | 3.795388153  | -4.198206892 | -1.975845611 |
| C | 4.936882514  | -2.401433333 | -1.568128114 | H | 5.668644695  | -0.447299641 | -1.149120800 |
| C | 4.813374137  | -1.103675809 | -1.096331782 | H | -7.998287525 | 3.854915191  | 0.772020726  |
| C | 3.601847544  | -0.580100404 | -0.596432412 | H | -6.947024478 | 2.830242063  | 1.763263150  |
| C | -6.743945724 | 2.500346436  | -0.391515608 | H | -6.275830820 | 4.218703213  | 0.903945747  |
| C | -7.002373191 | 3.405762766  | 0.835318056  | H | -7.816017078 | 3.805859952  | -1.773418501 |
| C | -6.826303696 | 3.347823334  | -1.682494340 | H | -6.655045057 | 2.728102413  | -2.566772775 |
| C | -7.861287769 | 1.442017846  | -0.443219563 | H | -6.085353786 | 4.150473977  | -1.690495770 |
| C | -1.004691184 | 6.850046450  | 0.223957996  | H | -7.877508850 | 0.822307731  | 0.457549872  |
| C | 0.316274090  | 7.635320299  | 0.320620970  | H | -8.832034909 | 1.939310060  | -0.517170982 |
| C | -1.745544603 | 7.314731757  | -1.051424536 | H | -7.762188216 | 0.785548952  | -1.312051824 |
| C | -1.857242717 | 7.194727745  | 1.467522375  | H | 0.102208883  | 8.706311073  | 0.367900716  |
| C | 5.688904722  | 3.933667688  | 0.445428082  | H | 0.881814141  | 7.373072490  | 1.219040440  |
| C | 5.702405515  | 5.062272630  | -0.611656762 | H | 0.954868690  | 7.466806820  | -0.550705031 |
| C | 5.59895391   | 4.554761670  | 1.858954971  | H | -1.916538975 | 8.395214066  | -1.019346181 |
| C | 7.022759480  | 3.170931720  | 0.343881621  | H | -2.717138543 | 6.826788634  | -1.157807747 |
| C | 6.254625629  | -2.975565222 | -2.114326058 | H | -1.159361645 | 7.089227105  | -1.946318547 |
| C | 6.072700418  | -3.362502891 | -3.600856786 | H | -1.356380753 | 6.874538096  | 2.385085006  |
| C | 7.418157862  | -1.972032725 | -2.018566302 | H | -2.020181033 | 8.275227041  | 1.527190501  |
| C | 6.637333495  | -4.233997409 | -1.300886628 | H | -2.836790298 | 6.712477511  | 1.437284223  |
| H | -1.638827930 | -5.942332998 | 1.155003997  | H | 6.564897279  | 5.717399647  | -0.455299131 |
| H | 0.373316747  | -6.769870594 | 2.272992432  | H | 5.767191151  | 4.649638425  | -1.622104167 |
| H | -5.666690549 | -2.026476009 | -0.663953461 | H | 4.802816834  | 5.679829385  | -0.561022496 |
| H | -3.122296489 | -5.359859451 | 0.052738486  | H | 6.456327941  | 5.210121086  | 2.041373127  |
| H | -7.741628145 | -4.822097942 | -1.288335608 | H | 5.595833610  | 3.776225581  | 2.626523872  |
| H | -7.348698850 | -3.457717791 | -0.243413754 | H | 4.691531293  | 5.149691971  | 1.984586947  |
| H | -6.853142137 | -3.448438191 | -1.946441221 | H | 7.164794146  | 2.729864034  | -0.646508048 |
| H | -6.039008337 | -6.392485245 | -2.119863099 | H | 7.852711393  | 3.860588019  | 0.518962616  |
| H | -4.339579949 | -6.257830803 | -1.660375287 | H | 7.094244923  | 2.374272798  | 1.089207627  |
| H | -5.045570896 | -5.075888165 | -2.766088444 | H | 7.001720821  | -3.780654504 | -4.000753366 |
| H | -5.059894925 | -6.263128872 | 0.839111458  | H | 5.287254502  | -4.109892501 | -3.733566180 |
| H | -6.241973266 | -5.080981464 | 1.407402320  | H | 5.806490606  | -2.488199108 | -4.201005960 |
| H | -6.744994236 | -6.392920441 | 0.328618669  | H | 8.332836186  | -2.433313532 | -2.400647505 |
| H | 1.349701356  | 5.399635377  | 0.191473141  | H | 7.607723388  | -1.669329463 | -0.985060406 |
| H | -2.869727793 | 4.904510853  | 0.084964148  | H | 7.231061002  | -1.073056529 | -2.612113772 |
| H | -4.367809116 | 3.766946093  | -0.231352538 | H | 6.779056423  | -3.987426773 | -0.245154170 |
| H | -5.989853750 | -0.161306655 | -0.290672942 | H | 5.867807167  | -5.006595669 | -1.362084125 |
| H | 5.576092176  | 1.216136273  | -0.099700851 | H | 7.570889688  | -4.661366105 | -1.679715667 |
| H | 3.075300406  | 4.617108312  | 0.443740230  |   |              |              |              |

**Optimized Cartesian coordinates of different complexes ( $S_0$  state) at the B3LYP/6-311G(d,p) level of theory.**

**SeNG**

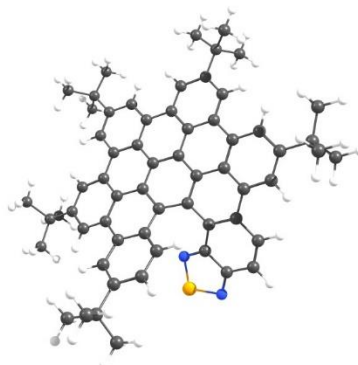

**Coordinates of Optimized Structure SeNG**

|    |              |              |              |   |              |              |              |
|----|--------------|--------------|--------------|---|--------------|--------------|--------------|
| C  | 0.589771000  | -3.900967000 | -0.526111000 | C | 2.527845000  | 4.362196000  | -0.136187000 |
| C  | 0.301413000  | -5.254656000 | -0.941469000 | C | 2.240338000  | 2.990996000  | -0.048241000 |
| C  | -0.862536000 | -5.624183000 | -1.530670000 | C | 3.301748000  | 1.985078000  | 0.041334000  |
| C  | -1.832269000 | -4.615208000 | -1.824733000 | C | 4.659102000  | 2.340740000  | 0.081703000  |
| C  | -1.585791000 | -3.236951000 | -1.394537000 | C | 5.678941000  | 1.397132000  | 0.151904000  |
| C  | -0.387236000 | -2.906587000 | -0.633073000 | C | 5.313309000  | 0.048247000  | 0.194246000  |
| N  | -2.926675000 | -4.839784000 | -2.529575000 | C | 3.982378000  | -0.370443000 | 0.172445000  |
| Se | -3.734290000 | -3.234099000 | -2.733195000 | C | -3.202434000 | 1.354839000  | 0.362616000  |
| N  | -2.473084000 | -2.347391000 | -1.798180000 | C | -4.221329000 | 2.300921000  | 0.186991000  |
| C  | -0.123040000 | -1.560549000 | -0.146675000 | C | -3.952241000 | 3.634127000  | -0.111616000 |
| C  | 1.235188000  | -1.165967000 | -0.059428000 | C | -2.611470000 | 4.020812000  | -0.193821000 |
| C  | 2.266795000  | -2.163909000 | -0.002016000 | C | -1.553798000 | 3.121646000  | -0.035031000 |
| C  | 3.616440000  | -1.790135000 | 0.218387000  | C | -2.683250000 | -2.234700000 | 1.322042000  |
| C  | 4.557789000  | -2.791457000 | 0.489617000  | C | -3.908917000 | -2.561436000 | 1.859192000  |
| C  | 4.228356000  | -4.146633000 | 0.514456000  | C | -4.978681000 | -1.642770000 | 1.856157000  |
| C  | 2.912948000  | -4.498732000 | 0.208922000  | C | -4.724544000 | -0.384813000 | 1.331836000  |
| C  | 1.927662000  | -3.544829000 | -0.071081000 | C | -3.475162000 | -0.017453000 | 0.787459000  |
| C  | 5.253479000  | -5.245102000 | 0.853975000  | C | 7.170161000  | 1.782350000  | 0.178244000  |
| C  | 6.648361000  | -4.671505000 | 1.164530000  | C | 7.385795000  | 3.305451000  | 0.117902000  |
| C  | 4.771029000  | -6.030936000 | 2.095578000  | C | 7.813663000  | 1.258997000  | 1.483611000  |
| C  | 5.390044000  | -6.212642000 | -0.344890000 | C | 7.886919000  | 1.149023000  | -1.037148000 |
| C  | -1.127514000 | -0.610229000 | 0.208245000  | C | 1.840552000  | 6.838443000  | -0.278707000 |
| C  | -0.801216000 | 0.763509000  | 0.160040000  | C | 1.208501000  | 7.422106000  | -1.563963000 |
| C  | 0.552938000  | 1.178596000  | 0.031807000  | C | 1.245840000  | 7.553699000  | 0.956938000  |
| C  | 1.576196000  | 0.210015000  | 0.037185000  | C | 3.351917000  | 7.130334000  | -0.317101000 |
| C  | 2.955037000  | 0.609648000  | 0.083919000  | C | -5.061677000 | 4.677405000  | -0.340881000 |
| C  | 0.882416000  | 2.576335000  | -0.032853000 | C | -6.472088000 | 4.072622000  | -0.216192000 |
| C  | -1.852313000 | 1.751339000  | 0.188430000  | C | -4.931112000 | 5.807805000  | 0.706443000  |
| C  | -2.439522000 | -0.975965000 | 0.734569000  | C | -4.920848000 | 5.274228000  | -1.760755000 |
| C  | -0.150587000 | 3.553127000  | -0.088692000 | C | -6.334926000 | -2.043146000 | 2.459828000  |
| C  | 0.203015000  | 4.900530000  | -0.163235000 | C | -6.151776000 | -2.381470000 | 3.957939000  |
| C  | 1.532830000  | 5.331721000  | -0.194439000 | C | -7.383798000 | -0.922389000 | 2.346228000  |

|   |              |              |              |   |              |              |              |
|---|--------------|--------------|--------------|---|--------------|--------------|--------------|
| C | -6.878405000 | -3.286078000 | 1.716871000  | H | 8.949760000  | 1.409622000  | -1.028911000 |
| H | 1.060089000  | -6.010741000 | -0.794742000 | H | 7.811993000  | 0.059280000  | -1.032299000 |
| H | -1.054870000 | -6.644041000 | -1.837915000 | H | 1.416430000  | 8.494021000  | -1.635733000 |
| H | 5.571294000  | -2.499748000 | 0.715838000  | H | 1.615782000  | 6.935684000  | -2.454366000 |
| H | 2.646760000  | -5.546035000 | 0.202692000  | H | 0.124139000  | 7.292140000  | -1.580352000 |
| H | 7.334667000  | -5.488037000 | 1.403520000  | H | 1.452191000  | 8.627456000  | 0.910292000  |
| H | 7.066133000  | -4.131442000 | 0.310433000  | H | 1.681696000  | 7.162959000  | 1.880341000  |
| H | 6.629170000  | -3.995841000 | 2.023976000  | H | 0.162969000  | 7.425259000  | 1.019979000  |
| H | 5.491843000  | -6.813038000 | 2.352857000  | H | 3.833860000  | 6.670488000  | -1.184226000 |
| H | 3.805563000  | -6.512066000 | 1.923322000  | H | 3.513976000  | 8.209294000  | -0.385029000 |
| H | 4.664046000  | -5.368921000 | 2.958995000  | H | 3.858159000  | 6.778544000  | 0.585967000  |
| H | 5.730422000  | -5.681794000 | -1.238006000 | H | -7.220135000 | 4.849496000  | -0.395265000 |
| H | 6.117155000  | -6.998308000 | -0.117895000 | H | -6.640589000 | 3.278268000  | -0.948370000 |
| H | 4.441974000  | -6.698313000 | -0.586880000 | H | -6.654477000 | 3.665153000  | 0.781965000  |
| H | -0.578173000 | 5.647032000  | -0.183026000 | H | -5.715692000 | 6.556384000  | 0.558398000  |
| H | 3.558440000  | 4.678337000  | -0.156783000 | H | -3.967891000 | 6.318141000  | 0.636328000  |
| H | 4.923771000  | 3.385579000  | 0.053907000  | H | -5.025560000 | 5.411536000  | 1.721032000  |
| H | 6.095905000  | -0.696707000 | 0.226893000  | H | -5.006825000 | 4.494167000  | -2.521883000 |
| H | -5.247231000 | 1.976394000  | 0.269780000  | H | -5.706244000 | 6.014763000  | -1.941096000 |
| H | -2.388757000 | 5.055880000  | -0.410223000 | H | -3.957680000 | 5.770370000  | -1.900175000 |
| H | -1.881457000 | -2.958718000 | 1.375721000  | H | -7.108181000 | -2.676028000 | 4.401158000  |
| H | -4.034345000 | -3.540753000 | 2.306433000  | H | -5.449111000 | -3.204610000 | 4.105227000  |
| H | -5.499972000 | 0.364726000  | 1.378727000  | H | -5.773258000 | -1.516149000 | 4.508747000  |
| H | 8.456524000  | 3.524786000  | 0.140297000  | H | -8.331865000 | -1.262981000 | 2.770898000  |
| H | 6.981265000  | 3.737805000  | -0.801327000 | H | -7.568976000 | -0.644305000 | 1.304992000  |
| H | 6.928515000  | 3.816038000  | 0.969869000  | H | -7.082345000 | -0.025305000 | 2.893805000  |
| H | 8.875468000  | 1.521936000  | 1.515862000  | H | -7.021356000 | -3.072877000 | 0.654049000  |
| H | 7.737460000  | 0.172511000  | 1.567547000  | H | -6.199437000 | -4.137828000 | 1.797536000  |
| H | 7.327679000  | 1.696199000  | 2.360023000  | H | -7.843081000 | -3.587430000 | 2.136861000  |
| H | 7.455168000  | 1.508303000  | -1.975111000 |   |              |              |              |

## References

- S1. Iyer, V. S.; Wehmeier, M.; Brand, J. D.; Keegstra, M. A. and Mullen, K. *Angew. Chem Int. Ed. Engl.* **1997**, *36*, 1603-1607.
- S2. Frisch, M. J.; Trucks, G. W.; Schlegel, H. B.; Scuseria, G. E.; Robb, M. A.; Cheeseman, J. R.; Scalmani, G.; Barone, V.; Mennucci, B.; Petersson, G. A.; Nakatsuji, H.; Caricato, M.; Li, X.; Hratchian, H. P.; Izmaylov, A. F.; Bloino, J.; Zheng, G.; Sonnenberg, J. L.; Hada, M.; Ehara, M.; Toyota, K.; Fukuda, R.; Hasegawa, J.; Ishida, M.; Nakajima, T.; Honda, Y.; Kitao, O.; Nakai, H.; Vreven, T.; Montgomery, J. A. Jr., Peralta, J. E.; Ogliaro, F.; Bearpark, M.; Heyd, J. J.; Brothers, E.; Kudin, K. N.; Staroverov, V. N.; Kobayashi, R.; Normand, J.; Raghavachari, K.; Rendell, A.; Burant, J. C.; Iyengar, S. S.; Tomasi, J.; Cossi, M.; Rega, N.; Millam, J. M.; Klene, M.; Knox, J. E.; Cross, J. B.; Bakken, V.; Adamo, C.; Jaramillo, J.; Gomperts, R.; Stratmann, R. E.; Yazyev, O., Austin, A. J.; Cammi, R.; Pomelli, C.; Ochterski, J. W.; Martin, R. L.; Morokuma, K.; Zakrzewski, V. G.; Voth, G. A.; Salvador, P.; Dannenberg, J. J.; Dapprich, S.; Daniels, A. D.; Farkas, O.; Foresman, J. B.; Ortiz, J. V.; Cioslowski, J.; Fox, D. J.; Gaussian 09 (Revision A.02), Gaussian, Inc., Wallingford CT, 2009.
